# Supplementary material for: Association Between Preoperative Obstructive Sleep Apnea and Preoperative Positive Airway Pressure With Postoperative Intensive Care Unit Delirium
Source: PubMed Central journal article supplement (PMC7171553; doi:10.1001/jamanetworkopen.2020.3125), 2020-04-20
Supplement: jamanetwopen-3-e203125-s001.pdf [file jamanetwopen-3-e203125-s001.pdf]

## Supplementary Online Content

King CR, Fritz BA, Escallier K, et al. Association between preoperative obstructive sleep apnea and preoperative positive airway pressure with postoperative intensive care unit delirium. *JAMA Netw Open*. 2020;3(4):e203125.

doi:10.1001/jamanetworkopen.2020.3125

**eAppendix 1.** Description of Anesthesia Assessment and Coding of Predictor Variables

**eAppendix 2.** Imputation Procedure

**eTable 1.** Baseline Factors by OSA Status in Non-ICU and Overall Surgical Population

**eFigure 1.** Overall Analytic Flow

**eAppendix 3.** Exploration of ICU Admission and Missing Delirium Status as Sources of Bias

**eTable 2.** Assessment Rate by ICU After Filtering to Date After 11/1/2012

**eFigure 2.** Data Flow Before Applying ICU and Time Filters

**eFigure 3.** Histogram of Propensity to ICU Admission in Admitted and Unadmitted Patients

**eFigure 4.** Histogram of Propensity to CAM-ICU Assessment Among ICU Patients in Assessed and Unassessed Patients

**eTable 3.** Covariates by CAM-ICU Assessment Status and OSA Status

**eAppendix 4.** Propensity Score Generation and Primary Analysis

**eFigure 5.** Histogram of OSA Propensity Score by OSA Status in the Entire Surgical Population

**eAppendix 5.** Sensitivity Analyses and Alternative Analytic Approaches

**eAppendix 6.** Hyperparameters, Tuning, and Variable Importance

**eAppendix 7.** STOP-BANG Contrasts

**eTable 4.** Covariance and Marginal Distribution of STOP-BANG Elements

**eTable 5.** Prevalence of OSA Diagnosis and Rate of Missing STOP-BANG Criteria by Surgical Category

**eTable 6.** Comparison of Effect Estimates From Sensitivity Analyses

**eTable 7.** Logistic Regression Coefficients

**eTable 8.** Variable Importance Metrics for Propensity Models

**eAppendix 8.** Propensity Score Balance Diagnostics

**eReferences**

This supplementary material has been provided by the authors to give readers additional information about their work.

## **eAppendix 1. Description of Anesthesia Assessment and Coding of Predictor Variables**

The anesthesia assessment was performed by a nurse or nurse practitioner trained in preoperative evaluation or by an anesthesiology resident. After history, physical exam, and laboratory records were collated, these evaluations were reviewed with an attending anesthesiologist. Unless noted otherwise values used below were selected from a drop-down-menu or check-box by the anesthesia provider or nurse in the Metavision system.

The authors had complete access to the anesthesia information system, Metavision. The complete set of anesthesia cases entered into metavision during the study timeframe was extracted. These contained case ID's, dates of service, a medical record number, and a master record number. The set of medical record numbers was submitted to extract all matching administrative records including demographics, hospitalization dates, billing codes, and ICU admission and discharge times. Preoperative assessment and hospitalization encounter identifiers were submitted to obtain nursing flowsheets. Laboratory values were queried on the same set of patients in a 6 month interval surrounding the date of service. All metavision records were linked to a master record number; approximately 0.5% contained invalid medical record numbers and were matched by DoS to the hospitalization.

Pre-anesthesia evaluations from Metavision were linked for all cases from 6 months prior to the index case to 1 week after. Numerous evaluations were incomplete. Evaluations were marked as invalid if 1) completed on DoS with no findings and no ASA-PS 2) no findings but ASA-PS >2 3) CCI derived from administrative data present-on-admission diagnoses >2 higher than implied by evaluation 4) No location for evaluation. The presence of a chronic condition was marked as positive (or the worst-level for ordinal conditions) if any evaluations contained it as positive. Evaluation characteristics were assigned based on the evaluation with the least discrepancy by euclidean distance from the overall set of chronic conditions. STOP questionnaire and Neck measurements were entered separately in the EHR nursing flowsheets, and the most recent preoperative values were taken. For patients with zero completed preoperative evaluations, chronic conditions were taken from postoperative evaluations if present. This was relatively common in emergent cases, but very rare in elective ones used in the analysis. Vital signs were taken from the most recent non-missing values. OSA diagnosis was also obtained from ICD diagnosis codes associated with the admission, using ICD9CM codes 327.2, 780.51, 780.53, 780.57 and ICD10 codes G47.3 and R06.81. Nursing flowsheets for the CAM-ICU were categorized as "Positive" or "Negative" (no free text).

The following variables were included as predictors in propensity models. Variables marked as ordinal are treated as continuous by BART (tree-based methods functionally treat all numeric and ordinal variables the same), but used as categorical predictors in logistic regression and imputed as ordinal outcomes in MICE. A first pass of MICE was used to define conditional expected values, and quantitative variables > 5 standard deviations from their expected values were marked as missing. Heights > 213 cm or <120cm, weights < 20 kg or > 250 kg, systolic blood pressure < 25 mmHg or > 300 mmHg, diastolic blood pressures <10 mmHg, > 160 mmHg, neck circumferences < 20 cm or > 60 cm were marked as missing (data entry error).

Surgery type (Surg\_Type), categorical. Age, continuous. Sex, categorical. Race, categorical. Height, continuous. Weight, continuous. Charlson comorbidity index (CCI), continuous. Functional capacity, 5 level ordinal. ASA physical status (ASA), ordinal. Preoperative pain, continuous. Hypertension diagnosis (HTN), binary. Coronary artery disease diagnosis (CAD), binary. Prior myocardial infarction (CAD\_PRIORMI), binary. Congestive heart failure diagnosis (CHF), binary. Diastolic dysfunction (CHF\_Diastolic\_Function), 4 level ordinal. Left ventricular ejection fraction (LVEF), binary indicator for unmeasured plus continuous (qualitative categories "normal" "mildly reduced" "moderately reduced" and severely reduced" were mapped to 65%, 55%, 40%, and 25% respectively). Valvular disease, ordinal 5 levels. Valve affected, 4 binary variables. Atrial fibrillation (AFIB), ordinal 4 levels (isolated, paroxysmal, persistent, permanent). Pacemaker or ICD implanted (PPM\_ICD), binary. Diagnosis of TIA or stroke (CV\_TIA\_STROKE), binary. Diagnosis of peripheral arterial disease (PAD), binary. History of deep vein thrombosis (DVT) or pulmonary embolism (PE), binary. Diabetes, non-insulin dependent, binary. Insulin use,

categorical (none, previous, current, pump). Diagnosis of CKD, binary. Dialysis use, categorical (never, previously only, current PD, current HD). Diagnosis of pulmonary hypertension (PHTN), binary. Diagnosis of COPD, binary. Diagnosis of asthma, binary. Diagnosis of cirrhosis, binary, Diagnosis of cancer excluding isolated skin cancer, binary. Diagnosis of GERD, binary. Diagnosis of dementia, binary. History of coombs-positive blood reaction, binary. History of smoking, binary. Preoperative systolic blood pressure, continuous. Preoperative diastolic blood pressure, continuous. Year of service, continuous. Assessed before STOP-BANG screening (before\_screening), binary. ICU admission (is\_ICU), binary. AHRQ CCS category - categorical.

The following local average quantitative variables were extracted based on the reported ZCTA and census (2010) or american community survey (2016) data: total population, fraction urban, fraction black, white, asian, and hispanic, fraction of housing vacant, fraction of adults employed, fraction of adults living in poverty, fraction of adults with education of less than high school, high school, and college. To reduce colinearity the fraction college and fraction white were excluded (they are functionally reference categories).

Variables computed from the above (ideal body weight, BMI) were excluded during imputation to reduce issues with colinearity and passively imputed (i.e. recalculated).

Procedure codes were retrieved for 96% of ICU patients. Addresses were linked to a ZTCA for 67% of patients, with the unlinked addresses primarily PO boxes and business addresses.

Intraoperative and recovery area (for patients going to PACU before ICU) opioid doses were standardized to oral morphine equivalents as follows: oxycodone \* 1.5, IV meperidine \*0.3, IV morphine \*3, IV hydromorphone \*11.5, IV fentanyl (mcg) \*0.15, IV methadone \* 4.5. Sufentanil and remifentanil were discarded because of their short duration of action. No other opioids were encountered intraoperatively. The only intraoperative benzodiazepine used was midazolam. Postoperative sedation was defined as infusions of midazolam, propofol, or dexmedetomidine. Postoperative medication Postoperative intubation was extracted by 1) intubation or in-situ airway intraoperatively without an extubation mark and 2) ICU ventilator flowsheet events. Postoperative non-invasive positive pressure ventilation was detected by ventilation settings of "cpap," "bipap," "avaps," "vpap," and spelling variants not prior to an extubation event. We were unable to link postoperative medication *administrations* and instead rely on postoperative medication *orders* since benzodiazepines are not frequently ordered as as-needed medications at our institution without a belief that they will be necessary.

## **eAppendix 2. Imputation Procedure**

Procedure codes and CCS were not imputed; “missing procedure codes” was created as an additional factor level and risk stratification index was imputed as a usual numerical variable. CCS categories and surgical service categories with fewer than 40 occurrences in the dataset after all filters were collapsed to an “other” category. Missing covariate data was multiple imputed using chained regression <sup>1</sup> with 30 replicates. Imputation included OSA and delirium as predictor covariables. A multiple-impute-then-delete strategy <sup>2,3</sup> was used for all analyses (i.e. imputed outcomes were not used). OSA and PAP use were included in the procedure, but similarly never imputed. In sensitivity analyses we experimented with imputation using only the analytic sample, the entire surgical population, and excluding postoperative data.

**eTable 1.** Baseline Factors by OSA Status in Non-ICU and Overall Surgical Population  
See Table 1 for definitions.

|                                         | ICU -         |              |                      |         | Overall       |              |                      |         |
|-----------------------------------------|---------------|--------------|----------------------|---------|---------------|--------------|----------------------|---------|
|                                         | OSA -         | OSA +        | effect size (95% CI) | p       | OSA -         | OSA +        | effect size (95% CI) | p       |
|                                         | n=53167       | n=15767      |                      |         | n=58915       | n=17811      |                      |         |
| Female Sex                              |               |              | 0.29 (0.27 0.31)     | < 1e-05 |               |              | 0.29 (0.27 0.30)     | < 1e-05 |
| Yes                                     | 29381 (55.3%) | 6450 (40.9%) |                      |         | 31941 (54.2%) | 7120 (40.0%) |                      |         |
| surgery type                            |               |              | 0.070 (0.070 0.080)  | < 1e-05 |               |              | 0.070 (0.060 0.080)  | < 1e-05 |
| Operations on the cardiovascular system | 3286 (6.2%)   | 1039 (6.6%)  |                      |         | 5808 (9.9%)   | 2009 (11.3%) |                      |         |
| Operations on the digestive system      | 7666 (14.4%)  | 2049 (13.0%) |                      |         | 8692 (14.8%)  | 2360 (13.3%) |                      |         |
| Operations on the female genital organs | 5343 (10.0%)  | 962 (6.1%)   |                      |         | 5408 (9.2%)   | 983 (5.5%)   |                      |         |

|                                              |                  |                 |  |  |                  |                 |  |  |
|----------------------------------------------|------------------|-----------------|--|--|------------------|-----------------|--|--|
| Operations on the hemic and lymphatic system | 832<br>(1.6%)    | 276<br>(1.8%)   |  |  | 853<br>(1.4%)    | 286<br>(1.6%)   |  |  |
| Operations on the integumentary system       | 1685<br>(3.2%)   | 374<br>(2.4%)   |  |  | 1766<br>(3.0%)   | 406<br>(2.3%)   |  |  |
| Operations on the male genital organs        | 688<br>(1.3%)    | 312<br>(2.0%)   |  |  | 703<br>(1.2%)    | 321<br>(1.8%)   |  |  |
| Operations on the musculoskeletal system     | 12503<br>(23.5%) | 3988<br>(25.3%) |  |  | 13242<br>(22.5%) | 4303<br>(24.2%) |  |  |
| Operations on the nervous system             | 3871<br>(7.3%)   | 1411<br>(8.9%)  |  |  | 3994<br>(6.8%)   | 1444<br>(8.1%)  |  |  |
| Operations on the nose; mouth; and pharynx   | 1403<br>(2.6%)   | 418<br>(2.7%)   |  |  | 1436<br>(2.4%)   | 431<br>(2.4%)   |  |  |

|                                      |                  |                 |                           |         |                  |                 |                           |         |
|--------------------------------------|------------------|-----------------|---------------------------|---------|------------------|-----------------|---------------------------|---------|
| Operations on the respiratory system | 2762<br>(5.2%)   | 765<br>(4.9%)   |                           |         | 3017<br>(5.1%)   | 840<br>(4.7%)   |                           |         |
| Operations on the urinary system     | 4314<br>(8.1%)   | 1389<br>(8.8%)  |                           |         | 4479<br>(7.6%)   | 1447<br>(8.1%)  |                           |         |
| Other                                | 8814<br>(16.6%)  | 2784<br>(17.7%) |                           |         | 9517<br>(16.2%)  | 2981<br>(16.7%) |                           |         |
| ASA                                  |                  |                 | 0.21<br>(0.21<br>0.22)    | < 1e-05 |                  |                 | 0.21<br>(0.20<br>0.21)    | < 1e-05 |
| 1                                    | 4551<br>(8.6%)   | 183<br>(1.2%)   |                           |         | 4618<br>(7.8%)   | 187<br>(1.0%)   |                           |         |
| 2                                    | 26621<br>(50.1%) | 5403<br>(34.3%) |                           |         | 27435<br>(46.6%) | 5585<br>(31.4%) |                           |         |
| 3                                    | 18647<br>(35.1%) | 9026<br>(57.2%) |                           |         | 20876<br>(35.4%) | 9946<br>(55.8%) |                           |         |
| 4                                    | 3146<br>(5.9%)   | 1120<br>(7.1%)  |                           |         | 5638<br>(9.6%)   | 2042<br>(11.5%) |                           |         |
| 5                                    | 202<br>(0.4%)    | 35<br>(0.2%)    |                           |         | 348<br>(0.6%)    | 51<br>(0.3%)    |                           |         |
| Race                                 |                  |                 | 0.080<br>(0.070<br>0.090) | < 1e-05 |                  |                 | 0.080<br>(0.070<br>0.090) | < 1e-05 |
| Unknown                              | 596<br>(1.1%)    | 110<br>(0.7%)   |                           |         | 770<br>(1.3%)    | 151<br>(0.8%)   |                           |         |

|            |                  |                  |                             |         |                  |                  |                             |         |
|------------|------------------|------------------|-----------------------------|---------|------------------|------------------|-----------------------------|---------|
| Black      | 10851<br>(20.4%) | 2424<br>(15.4%)  |                             |         | 11756<br>(20.0%) | 2674<br>(15.0%)  |                             |         |
| White      | 39398<br>(74.1%) | 12912<br>(81.9%) |                             |         | 43819<br>(74.4%) | 14626<br>(82.1%) |                             |         |
| Other      | 2322<br>(4.4%)   | 321<br>(2.0%)    |                             |         | 2570<br>(4.4%)   | 360<br>(2.0%)    |                             |         |
| CAD        |                  |                  |                             |         |                  |                  |                             |         |
| Yes        | 4281<br>(8.1%)   | 2905<br>(18.4%)  | -0.34 (-<br>0.36 -<br>0.33) | < 1e-05 | 5737<br>(9.7%)   | 3692<br>(20.7%)  | -0.34 (-<br>0.36 -<br>0.32) | < 1e-05 |
| Atrial fib |                  |                  |                             |         |                  |                  |                             |         |
| Yes        | 1407<br>(2.6%)   | 1214<br>(7.7%)   | -0.27 (-<br>0.28 -<br>0.25) | < 1e-05 | 1824<br>(3.1%)   | 1498<br>(8.4%)   | -0.26 (-<br>0.28 -<br>0.25) | < 1e-05 |
| COPD       |                  |                  |                             |         |                  |                  |                             |         |
| Yes        | 3197<br>(6.0%)   | 1849<br>(11.7%)  | -0.22 (-<br>0.24 -<br>0.20) | < 1e-05 | 3882<br>(6.6%)   | 2271<br>(12.8%)  | -0.23 (-<br>0.24 -<br>0.21) | < 1e-05 |
| CKD        |                  |                  |                             |         |                  |                  |                             |         |
| Yes        | 4127<br>(7.8%)   | 2491<br>(15.8%)  | -0.27 (-<br>0.29 -<br>0.26) | < 1e-05 | 4877<br>(8.3%)   | 2964<br>(16.6%)  | -0.28 (-<br>0.29 -<br>0.26) | < 1e-05 |
| Dementia   |                  |                  |                             |         |                  |                  |                             |         |



|                    |                  |                  |                              |         |                  |                  |                              |         |
|--------------------|------------------|------------------|------------------------------|---------|------------------|------------------|------------------------------|---------|
| Yes                | 271<br>(0.5%)    | 110<br>(0.7%)    | -0.030<br>(-0.040<br>-0.010) | 0.01    | 301<br>(0.5%)    | 123<br>(0.7%)    | -0.020<br>(-0.040<br>-0.010) | 0.0089  |
| age (years)        |                  |                  |                              |         |                  |                  |                              |         |
| Mean (SD)          | 51 (17)          | 59 (13)          | -0.48 (-<br>0.50 -<br>0.46)  | < 1e-05 | 52 (17)          | 59 (13)          | -0.46 (-<br>0.47 -<br>0.44)  | < 1e-05 |
| Median [Q1,<br>Q3] | 53 [38,<br>64]   | 60 [52,<br>68]   |                              |         | 54 [39,<br>65]   | 61 [52,<br>68]   |                              |         |
| BMI<br>(mk/kg**2)  |                  |                  |                              |         |                  |                  |                              |         |
| Mean (SD)          | 28 (6.8)         | 34 (8.7)         | -0.83 (-<br>0.85 -<br>0.81)  | < 1e-05 | 28 (6.8)         | 34 (8.6)         | -0.83 (-<br>0.85 -<br>0.81)  | < 1e-05 |
| Median [Q1,<br>Q3] | 27 [23,<br>32]   | 33 [28,<br>39]   |                              |         | 27 [23,<br>31]   | 33 [28,<br>39]   |                              |         |
| Missing            | 1530<br>(2.9%)   | 101<br>(0.6%)    |                              |         | 2141<br>(3.6%)   | 156<br>(0.9%)    |                              |         |
| HTN                |                  |                  |                              |         |                  |                  |                              |         |
| Yes                | 18349<br>(34.5%) | 10968<br>(69.6%) | -0.74 (-<br>0.76 -<br>0.72)  | < 1e-05 | 20863<br>(35.4%) | 12423<br>(69.7%) | -0.72 (-<br>0.74 -<br>0.71)  | < 1e-05 |
| CCI                |                  |                  |                              |         |                  |                  |                              |         |

|                    |                     |                     |                      |         |                     |                      |                      |         |
|--------------------|---------------------|---------------------|----------------------|---------|---------------------|----------------------|----------------------|---------|
| Mean (SD)          | 2.0 (2.2)           | 2.8 (2.2)           | -0.35 (-0.37 - 0.33) | < 1e-05 | 2.1 (2.2)           | 2.9 (2.2)            | -0.34 (-0.36 - 0.32) | < 1e-05 |
| Median [Q1, Q3]    | 1.0 [0.0, 3.0]      | 2.0 [1.0, 4.0]      |                      |         | 2.0 [0.0, 3.0]      | 2.0 [1.0, 4.0]       |                      |         |
| Missing            | 550 (1.0%)          | 183 (1.2%)          |                      |         | 611 (1.0%)          | 201 (1.1%)           |                      |         |
| Risk strat index 1 |                     |                     |                      |         |                     |                      |                      |         |
| Mean (SD)          | -0.64 (0.58)        | -0.66 (0.61)        | 0.030 (0.010 0.050)  | 0.00081 | -0.62 (0.57)        | -0.63 (0.60)         | 0.030 (0.010 0.050)  | 0.0025  |
| Median [Q1, Q3]    | -0.66 [-1.0, -0.25] | -0.75 [-1.0, -0.25] |                      |         | -0.64 [-1.0, -0.25] | -0.66 [-0.98, -0.25] |                      |         |
| Missing            | 5565 (10.5%)        | 1931 (12.2%)        |                      |         | 5776 (9.8%)         | 2011 (11.3%)         |                      |         |
| ZTCA poverty       |                     |                     |                      |         |                     |                      |                      |         |
| Mean (SD)          | 16 (10)             | 15 (9.4)            | 0.12 (0.10 0.14)     | < 1e-05 | 16 (10)             | 15 (9.4)             | 0.11 (0.090 0.13)    | < 1e-05 |
| Median [Q1, Q3]    | 14 [8.2, 22]        | 13 [7.8, 20]        |                      |         | 14 [8.4, 22]        | 14 [8.0, 20]         |                      |         |
| Missing            | 16284 (30.6%)       | 4906 (31.1%)        |                      |         | 18149 (30.8%)       | 5558 (31.2%)         |                      |         |

|                       |                   |                   |                       |         |                   |                   |                       |         |
|-----------------------|-------------------|-------------------|-----------------------|---------|-------------------|-------------------|-----------------------|---------|
| ZTCA employment       |                   |                   |                       |         |                   |                   |                       |         |
| Mean (SD)             | 0.92 (0.051)      | 0.92 (0.045)      | -0.11 (-0.13 - 0.080) | < 1e-05 | 0.92 (0.051)      | 0.92 (0.045)      | -0.10 (-0.12 - 0.080) | < 1e-05 |
| Median [Q1, Q3]       | 0.93 [0.90, 0.95] | 0.93 [0.91, 0.95] |                       |         | 0.93 [0.90, 0.95] | 0.93 [0.91, 0.95] |                       |         |
| Missing               | 16284 (30.6%)     | 4906 (31.1%)      |                       |         | 18149 (30.8%)     | 5558 (31.2%)      |                       |         |
| ZTCA housing          |                   |                   |                       |         |                   |                   |                       |         |
| Mean (SD)             | 11 (7.1)          | 10 (6.4)          | 0.12 (0.10 0.14)      | < 1e-05 | 11 (7.1)          | 10 (6.5)          | 0.11 (0.090 0.13)     | < 1e-05 |
| Median [Q1, Q3]       | 9.2 [6.8, 13]     | 9.0 [6.5, 12]     |                       |         | 9.2 [6.8, 13]     | 9.1 [6.6, 12]     |                       |         |
| Missing               | 16284 (30.6%)     | 4906 (31.1%)      |                       |         | 18149 (30.8%)     | 5558 (31.2%)      |                       |         |
| Postop benzodiazepine |                   |                   |                       |         |                   |                   |                       |         |
| Yes                   | 1880 (3.5%)       | 457 (2.9%)        | 0.040 (0.020 0.050)   | 4.3e-05 | 3491 (5.9%)       | 1001 (5.6%)       | 0.010 (0.0 0.030)     | 0.12    |
| Postop sedation       |                   |                   |                       |         |                   |                   |                       |         |

|                                         |                  |                  |                              |         |                  |                  |                              |         |
|-----------------------------------------|------------------|------------------|------------------------------|---------|------------------|------------------|------------------------------|---------|
| Yes                                     | 717<br>(1.3%)    | 182<br>(1.2%)    | 0.020<br>(0.0<br>0.030)      | 0.049   | 2066<br>(3.5%)   | 637<br>(3.6%)    | 0.0 (-<br>0.020<br>0.010)    | 0.66    |
| Postop<br>intubation                    |                  |                  |                              |         |                  |                  |                              |         |
| Yes                                     | 2458<br>(4.6%)   | 617<br>(3.9%)    | 0.030<br>(0.020<br>0.050)    | 7.5e-05 | 5932<br>(10.1%)  | 1937<br>(10.9%)  | -0.030<br>(-0.040<br>-0.010) | 0.0023  |
| No                                      | 50709<br>(95.4%) | 15150<br>(96.1%) |                              |         | 52983<br>(89.9%) | 15874<br>(89.1%) |                              |         |
| Postop<br>NIPPV                         |                  |                  |                              |         |                  |                  |                              |         |
| Yes                                     | 840<br>(1.6%)    | 380<br>(2.4%)    | -0.060<br>(-0.080<br>-0.050) | < 1e-05 | 1895<br>(3.2%)   | 1130<br>(6.3%)   | -0.16 (-<br>0.18 -<br>0.14)  | < 1e-05 |
| OME                                     |                  |                  |                              |         |                  |                  |                              |         |
| Mean (SD)                               | 56 (40)          | 58 (40)          | -0.040<br>(-0.060<br>-0.020) | 1.2e-05 | 60 (43)          | 63 (45)          | -0.070<br>(-0.080<br>-0.050) | < 1e-05 |
| Median [Q1,<br>Q3]                      | 50 [30,<br>74]   | 52 [30,<br>75]   |                              |         | 53 [31,<br>77]   | 53 [33,<br>81]   |                              |         |
| Pre and<br>intraop<br>midazolam<br>dose |                  |                  |                              |         |                  |                  |                              |         |
| Mean (SD)                               | 2.2 (1.9)        | 2.1<br>(2.5)     | 0.060<br>(0.040<br>0.080)    | < 1e-05 | 2.3 (2.0)        | 2.1 (2.5)        | 0.050<br>(0.040<br>0.070)    | < 1e-05 |

|                    |                   |                   |  |  |                   |                   |  |  |
|--------------------|-------------------|-------------------|--|--|-------------------|-------------------|--|--|
| Median [Q1,<br>Q3] | 2.0 [1.0,<br>3.0] | 2.0 [1.0,<br>3.0] |  |  | 2.0 [1.0,<br>3.0] | 2.0 [0.0,<br>3.0] |  |  |
|--------------------|-------------------|-------------------|--|--|-------------------|-------------------|--|--|

**eFigure 1. Overall Analytic Flow**

See eAppendix 4 for primary analysis plan. After data filters (age, general anesthesia, anesthesia assessment completed, icu admission) are applied multiple imputation by chained regression is applied to generate 30 "completed" datasets. Within each round a propensity score is calculated. The data are then re-filtered to remove patients whose outcomes were unknown. An effect size estimate for OSA is calculated within each completed dataset by BART, BCF, matching, regression. For each method, the results are then combined across the 30 imputations by Rubin's rules for matching and regression and by mixing the posterior simulations for BART and BCF. Confidence intervals generated by Wald method for regression and matching, and highest-posterior-density credible intervals are created for BART and BCF. Ovals in figure are a vertical ellipsis. Sensitivity analyses contain variations of this flow.

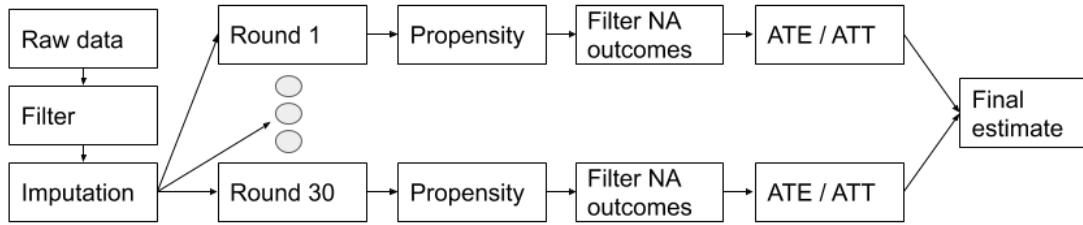

### **eAppendix 3.** Exploration of ICU Admission and Missing Delirium Status as Sources of Bias

We found that among all patients admitted to the ICU postoperatively, there was a substantial fraction of never-assessed patients (zero documented CAM-ICU). To reduce concerns from bias caused by missing data, we investigated the patterns of missing assessments. First, we found that although CAM-ICUs were performed during the specified time period (8/2012-8/2106), they were not routinely documented as discrete data until 11/2012 (18% pre and 70% post). We had initially planned to include data through 2018; however, the informatics infrastructure unexpectedly changed after our initial data pull in 2016 and removed the ability to feasibly query data. We therefore excluded cases before that time. Second, we found that the rate of performing CAM-ICU varied dramatically by ICU. Patients in the neurosurgical ICU had CAM-ICUs performed in a low fraction of cases (1.8% with year to year variation); other ICUs had less extreme fractions (cardiac care 66%, bone marrow transplant 55%). The remaining ICUs (cardiothoracic surgery, surgical-burn, medical) had high fractions of assessment (84-90%). We also found that many patients in the non-surgical ICUs had relatively minor surgical procedures (tracheostomy, gastric tube placement, wound re-debridement, dressing change under anesthesia). The attribution of delirium in patients with substantial prior ICU stays as "postoperative" would be ambiguous; however, we did not wish to exclude all patients with prior ICU stays as it was not uncommon to have brief pre-admissions to the ICU before major surgery. We therefore excluded patients with  $\geq 6$  days of prior ICU stay, as this would eliminate the majority of these minor procedures in severely ill patients. Patients with an *index* surgery without a prior ICU stay remain in the dataset even if they re-visit the OR in the subsequent 7 days. A version of Figure 1 *without* these steps is provided in eFigure 2. These filters are a deviation from the analysis plan but primarily refine the included population rather than change the analysis. That is, because almost all excluded patients would have been excluded later (by virtue of lacking a delirium assessment) the actual analytic population is little changed, but the results can be stated with more confidence that selection bias in missing assessments did not play a major role.

**eTable 2.** Assessment Rate by ICU After Filtering to Date After 11/1/2012

| icu_unit          | assessment rate | n total |
|-------------------|-----------------|---------|
| 10400 ICU         | 0.0181          | 2535    |
| 4400 ICU          | 0.904           | 5038    |
| 5600 ICU          | 0.849           | 3952    |
| 8200 ICU          | 0.665           | 242     |
| 83 CTICU          | 0.904           | 477     |
| 8300 ICU          | 0.744           | 129     |
| 8400 ICU          | 0.878           | 74      |
| 8900 ICU          | 0.52            | 25      |
| 8900 Oncology ICU | 0.4             | 5       |



**eFigure 2.** Data Flow Before Applying ICU and Time Filters (pre-specified plan), compare to Figure 1.

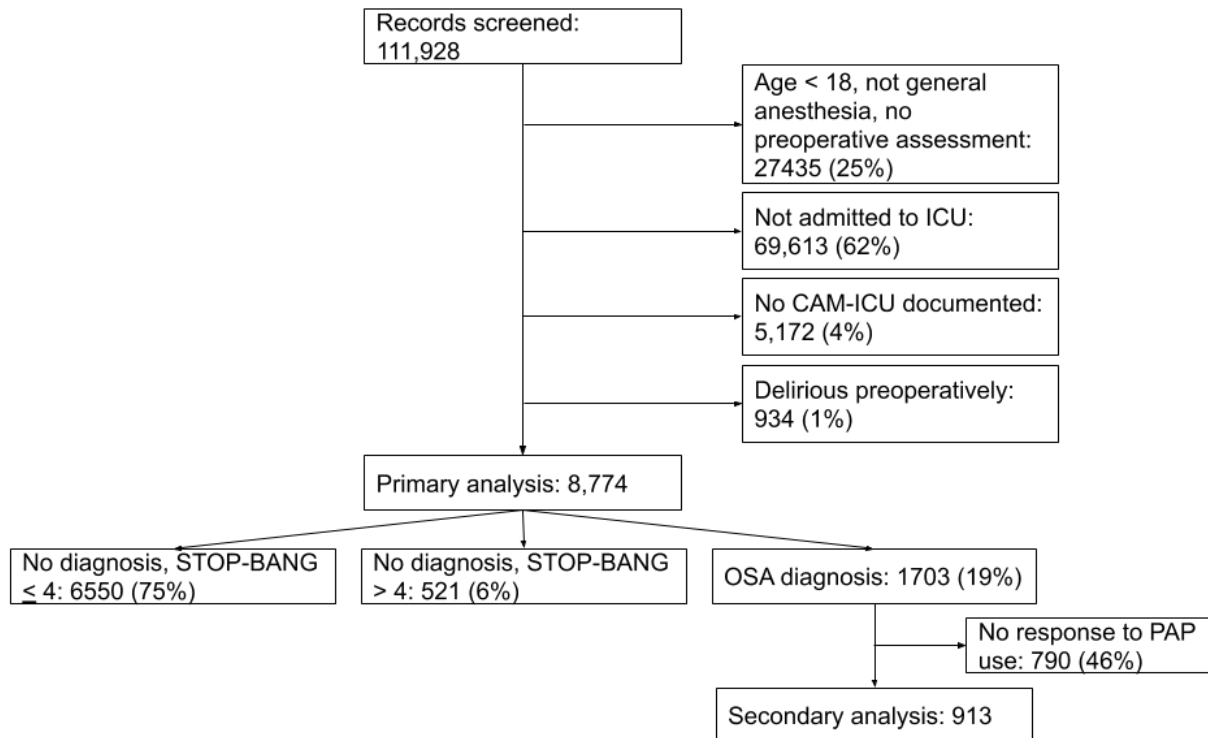

After applying these restrictions, to explore the possibility of OSA changing ICU admission rates or CAM-ICU performance, we then undertook a propensity analysis of CAM-ICU documentation in 2 steps. First, we fit a propensity model of ICU admission (using decision trees and gradient boosted decision trees) using the entire surgical cohort. Then, among patients admitted to the ICU we fit a similar model with the response an indicator variable of having any CAM-ICU assessments.

The ICU admission model had relatively good predictive performance (AUROC 0.941). A histogram of the fitted values of the ICU-admission model (eFigure 3) shows that while a substantial fraction of ICU patients have high propensity to admission, about half lay in an overlapping region with non-admitted patients. Model diagnostics showed that surgical procedure (CCS category), emergency surgery, and ASA-PS explained the majority of the fitted propensity ( $R^2 = 82\%$ ). Examination of the fitted model showed that OSA status was never used as a decision tree node. However, because of its correlation to other variables, OSA diagnosis was correlated with fitted propensity to admission (regression coefficient 0.37, SE 0.04 on log-odds scale) but explained only 0.7% of the variation in propensity. In the sensitivity analyses below, the propensity model above is used to select unadmitted patients to serve as additional controls.

**eFigure 3.** Histogram of Propensity to ICU Admission in Admitted and Unadmitted Patients  
 X-axis: log-odds of propensity to ICU admission from gradient boosted decision tree model. Y-axis: counts. Blue: admitted to ICU. Red: not admitted to ICU.

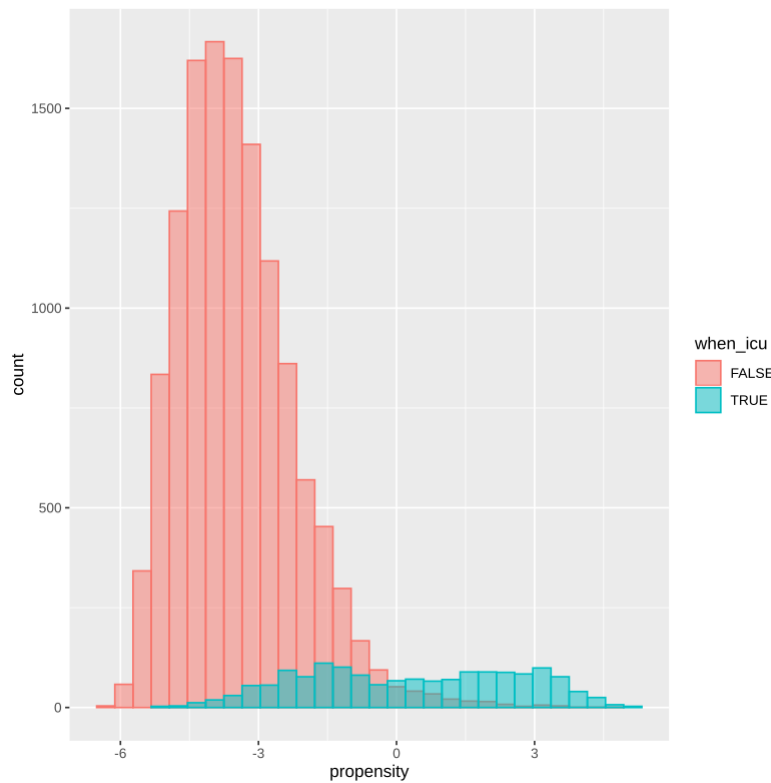

The assessment model had relatively poor predictive performance (AUROC 0.619). Correlates of never-assessment were ASA-PS 5 (9% vs 2%), length of ICU stay  $\leq 24$  hours (32% vs 15%), and in-hospital mortality (24% vs 6%). Using a model on the assessed patients (excluding OSA status) applied to the never assessed patients, the predicted probabilities for delirium had a mean of 51% and (0.1, 0.25, 0.5, 0.75, 0.9) quantiles of [0.23 0.34 0.51 0.68 0.79]. Using a hold-out sample of assessed patients, the mean probability was 47% and quantiles [0.20 0.30 0.44 0.64 0.77]. These suggest that never-assessed patients were enriched in both moribund individuals, who may have not been assessed because of a lack of adequate mental status, and individuals with low risk of delirium and very short stays, but that unassessed patients were not systematically very different in delirium risk. The raw odds-ratio for never-assessment by OSA is 1.16 (95% CI 1.00 to 1.35,  $p=0.046$ ). OSA status was modestly correlated with fitted propensity (regression coefficient 0.20 SE .03 on log-odds scale) with very little explained variation ( $R^2=1.9\%$ ). It was the 28th most influential predictor by mean absolute Shapely value. eFigure 4 plots a similar propensity histogram to eFigure 3. Because all non-assessed patients were in a broadly overlapping region of propensity with assessed patients, no matching procedure was used for the below sensitivity analysis.

**eFigure 4.** Histogram of Propensity to CAM-ICU Assessment Among ICU Patients in Assessed and Unassessed Patients

X-axis: log-odds of propensity to CAM-ICU performance from gradient boosted decision tree model. Y-axis: counts. Blue: assessed. Red: not assessed.

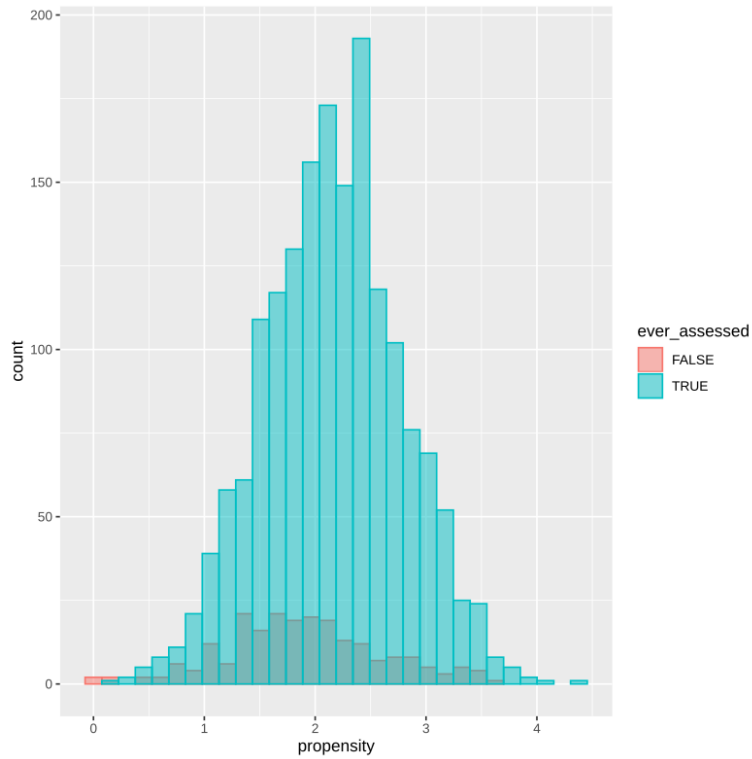

**eTable 3.** Covariates by CAM-ICU Assessment Status and OSA Status

Among those admitted to eligible ICUs and without pre-admission  $\geq 6$  days. See Table 1 for definitions.

|                                         | OSA -       |              | OSA +       |              |
|-----------------------------------------|-------------|--------------|-------------|--------------|
|                                         | No CAM      | Any CAM      | No CAM      | Any CAM      |
|                                         | (n=893)     | (n=6417)     | (n=259)     | (n=2161)     |
| Female Sex                              |             |              |             |              |
| Yes                                     | 393 (44.0%) | 2827 (44.1%) | 77 (29.7%)  | 719 (33.3%)  |
| No                                      | 500 (56.0%) | 3590 (55.9%) | 182 (70.3%) | 1442 (66.7%) |
| Surgery type                            |             |              |             |              |
| Operations on the cardiovascular system | 410 (45.9%) | 2681 (41.8%) | 135 (52.1%) | 1000 (46.3%) |
| Operations on the digestive system      | 130 (14.6%) | 1240 (19.3%) | 35 (13.5%)  | 343 (15.9%)  |

|                                              |             |             |           |             |
|----------------------------------------------|-------------|-------------|-----------|-------------|
| Operations on the female genital organs      | 12 (1.3%)   | 72 (1.1%)   | 3 (1.2%)  | 21 (1.0%)   |
| Operations on the hemic and lymphatic system | 7 (0.8%)    | 23 (0.4%)   | 3 (1.2%)  | 10 (0.5%)   |
| Operations on the integumentary system       | 11 (1.2%)   | 104 (1.6%)  | 1 (0.4%)  | 37 (1.7%)   |
| Operations on the male genital organs        | 2 (0.2%)    | 15 (0.2%)   | 4 (1.5%)  | 11 (0.5%)   |
| Operations on the musculoskeletal system     | 115 (12.9%) | 874 (13.6%) | 25 (9.7%) | 335 (15.5%) |
| Operations on the nervous system             | 21 (2.4%)   | 138 (2.2%)  | 2 (0.8%)  | 36 (1.7%)   |

|                                            |             |              |             |             |
|--------------------------------------------|-------------|--------------|-------------|-------------|
| Operations on the nose; mouth; and pharynx | 8 (0.9%)    | 39 (0.6%)    | 1 (0.4%)    | 13 (0.6%)   |
| Operations on the respiratory system       | 70 (7.8%)   | 283 (4.4%)   | 17 (6.6%)   | 84 (3.9%)   |
| Operations on the urinary system           | 17 (1.9%)   | 175 (2.7%)   | 8 (3.1%)    | 60 (2.8%)   |
| Other                                      | 90 (10.1%)  | 773 (12.0%)  | 25 (9.7%)   | 211 (9.8%)  |
| ASA                                        |             |              |             |             |
| 1                                          | 9 (1.0%)    | 67 (1.0%)    | 0 (0%)      | 4 (0.2%)    |
| 2                                          | 118 (13.2%) | 860 (13.4%)  | 18 (6.9%)   | 187 (8.7%)  |
| 3                                          | 313 (35.1%) | 2488 (38.8%) | 91 (35.1%)  | 964 (44.6%) |
| 4                                          | 372 (41.7%) | 2841 (44.3%) | 132 (51.0%) | 986 (45.6%) |
| 5                                          | 81 (9.1%)   | 161 (2.5%)   | 18 (6.9%)   | 20 (0.9%)   |
| RACE                                       |             |              |             |             |

|            |             |              |             |              |
|------------|-------------|--------------|-------------|--------------|
| Unknown    | 34 (3.8%)   | 214 (3.3%)   | 0 (0%)      | 46 (2.1%)    |
| Black      | 158 (17.7%) | 1078 (16.8%) | 43 (16.6%)  | 270 (12.5%)  |
| White      | 655 (73.3%) | 4857 (75.7%) | 204 (78.8%) | 1805 (83.5%) |
| Other      | 46 (5.2%)   | 268 (4.2%)   | 12 (4.6%)   | 40 (1.9%)    |
| CAD        |             |              |             |              |
| Yes        | 218 (24.4%) | 1520 (23.7%) | 100 (38.6%) | 815 (37.7%)  |
| No         | 675 (75.6%) | 4897 (76.3%) | 159 (61.4%) | 1346 (62.3%) |
| Atrial fib |             |              |             |              |
| Yes        | 47 (5.3%)   | 450 (7.0%)   | 59 (22.8%)  | 290 (13.4%)  |
| No         | 846 (94.7%) | 5967 (93.0%) | 200 (77.2%) | 1871 (86.6%) |
| COPD       |             |              |             |              |
| Yes        | 97 (10.9%)  | 746 (11.6%)  | 63 (24.3%)  | 441 (20.4%)  |
| No         | 796 (89.1%) | 5671 (88.4%) | 196 (75.7%) | 1720 (79.6%) |
| CKD        |             |              |             |              |

|                 |             |              |             |              |
|-----------------|-------------|--------------|-------------|--------------|
| Yes             | 126 (14.1%) | 817 (12.7%)  | 80 (30.9%)  | 497 (23.0%)  |
| No              | 767 (85.9%) | 5600 (87.3%) | 179 (69.1%) | 1664 (77.0%) |
| Dementia        |             |              |             |              |
| Yes             | 7 (0.8%)    | 32 (0.5%)    | 3 (1.2%)    | 14 (0.6%)    |
| No              | 886 (99.2%) | 6385 (99.5%) | 256 (98.8%) | 2147 (99.4%) |
| age (years)     |             |              |             |              |
| Mean (SD)       | 57 (17)     | 58 (16)      | 60 (13)     | 62 (12)      |
| Median [Q1, Q3] | 60 [47, 69] | 60 [48, 69]  | 60 [53, 69] | 63 [55, 70]  |
| BMI (mk/kg**2)  |             |              |             |              |
| Mean (SD)       | 28 (7.2)    | 28 (6.7)     | 34 (8.5)    | 34 (8.5)     |
| Median [Q1, Q3] | 27 [23, 31] | 27 [23, 31]  | 33 [28, 38] | 32 [28, 38]  |
| Missing         | 114 (12.8%) | 745 (11.6%)  | 7 (2.7%)    | 62 (2.9%)    |



|                    |                      |                      |                     |                      |
|--------------------|----------------------|----------------------|---------------------|----------------------|
| HTN                |                      |                      |                     |                      |
| Yes                | 348 (39.0%)          | 2704 (42.1%)         | 193 (74.5%)         | 1513 (70.0%)         |
| No                 | 545 (61.0%)          | 3713 (57.9%)         | 66 (25.5%)          | 648 (30.0%)          |
| CCI                |                      |                      |                     |                      |
| Mean (SD)          | 2.7 (2.4)            | 2.7 (2.3)            | 3.3 (2.4)           | 3.3 (2.3)            |
| Median [Q1, Q3]    | 2.0 [1.0, 4.0]       | 2.0 [1.0, 4.0]       | 3.0 [2.0, 5.0]      | 3.0 [2.0, 5.0]       |
| Missing            | 14 (1.6%)            | 67 (1.0%)            | 3 (1.2%)            | 19 (0.9%)            |
| Risk strat index 1 |                      |                      |                     |                      |
| Mean (SD)          | -0.42 (0.46)         | -0.44 (0.48)         | -0.41 (0.49)        | -0.46 (0.49)         |
| Median [Q1, Q3]    | -0.44 [-0.66, -0.20] | -0.44 [-0.66, -0.21] | -0.44 [-0.66, 0.18] | -0.46 [-0.81, -0.20] |
| Missing            | 25 (2.8%)            | 238 (3.7%)           | 7 (2.7%)            | 86 (4.0%)            |
| ZTCA poverty       |                      |                      |                     |                      |
| Mean (SD)          | 16 (10)              | 17 (9.8)             | 15 (8.8)            | 16 (9.0)             |

|                           |                   |                   |                   |                   |
|---------------------------|-------------------|-------------------|-------------------|-------------------|
| Median [Q1, Q3]           | 16 [8.7, 21]      | 15 [9.0, 22]      | 14 [7.8, 21]      | 15 [9.0, 21]      |
| Missing                   | 349 (39.1%)       | 2329 (36.3%)      | 112 (43.2%)       | 736 (34.1%)       |
| ZTCA employment           |                   |                   |                   |                   |
| Mean (SD)                 | 0.92 (0.046)      | 0.92 (0.049)      | 0.92 (0.054)      | 0.92 (0.042)      |
| Median [Q1, Q3]           | 0.93 [0.91, 0.95] | 0.93 [0.91, 0.95] | 0.94 [0.90, 0.95] | 0.93 [0.91, 0.95] |
| Missing                   | 349 (39.1%)       | 2329 (36.3%)      | 112 (43.2%)       | 736 (34.1%)       |
| ZTCA housing              |                   |                   |                   |                   |
| Mean (SD)                 | 11 (7.6)          | 11 (7.3)          | 11 (8.0)          | 11 (6.6)          |
| Median [Q1, Q3]           | 9.4 [6.8, 13]     | 9.5 [6.9, 13]     | 9.6 [6.4, 13]     | 9.3 [7.1, 12]     |
| Missing                   | 349 (39.1%)       | 2329 (36.3%)      | 112 (43.2%)       | 736 (34.1%)       |
| Postop<br>benzodiazepines |                   |                   |                   |                   |
| Yes                       | 262 (29.3%)       | 1886 (29.4%)      | 80 (30.9%)        | 580 (26.8%)       |

|                             |              |              |              |              |
|-----------------------------|--------------|--------------|--------------|--------------|
| No                          | 631 (70.7%)  | 4531 (70.6%) | 179 (69.1%)  | 1581 (73.2%) |
| Postop sedation             |              |              |              |              |
| Yes                         | 130 (14.6%)  | 1547 (24.1%) | 34 (13.1%)   | 492 (22.8%)  |
| No                          | 763 (85.4%)  | 4870 (75.9%) | 225 (86.9%)  | 1669 (77.2%) |
| Postop intubation           |              |              |              |              |
| Yes                         | 481 (53.9%)  | 4034 (62.9%) | 146 (56.4%)  | 1418 (65.6%) |
| No                          | 412 (46.1%)  | 2383 (37.1%) | 113 (43.6%)  | 743 (34.4%)  |
| Postop NIPPV                |              |              |              |              |
| Yes                         | 82 (9.2%)    | 1248 (19.4%) | 70 (27.0%)   | 803 (37.2%)  |
| No                          | 811 (90.8%)  | 5169 (80.6%) | 189 (73.0%)  | 1358 (62.8%) |
| Intraop oral morphine equiv |              |              |              |              |
| Mean (SD)                   | 81 (63)      | 86 (60)      | 83 (60)      | 95 (63)      |
| Median [Q1, Q3]             | 68 [38, 110] | 75 [38, 120] | 68 [38, 120] | 83 [46, 140] |

|                                |                |                |                |                |
|--------------------------------|----------------|----------------|----------------|----------------|
| Pre and intraop midazolam dose |                |                |                |                |
| Mean (SD)                      | 2.7 (3.2)      | 2.6 (3.0)      | 2.3 (3.0)      | 2.5 (2.9)      |
| Median [Q1, Q3]                | 2.0 [0.0, 5.0] | 2.0 [0.0, 5.0] | 2.0 [0.0, 5.0] | 2.0 [0.0, 5.0] |

## eAppendix 4. Propensity Score Generation and Primary Analysis

Within each imputation round, propensity scores were calculated,<sup>4</sup> and estimates of the average treatment effect (ATE) or average treatment effect on the treated (ATT) were computed (see below). Frequentist estimates were combined using Rubin's rules, and Bayesian posterior samples of treatment effects were concatenated into a single estimate.<sup>5,6</sup>

Propensity scores for the primary and secondary exposures were calculated using gradient boosted decision trees (xgboost library) within each imputation round, with all tuning parameters selected by 5-fold cross validation. All preoperative variables excluding OSA diagnosis, STOP-BANG total and questionnaire values, and neck measurement were included in the propensity model. Surgery was included as both the service category and single-level AHRQ CCS. We also experimented with propensity scores calculated by BART, and found them to be minimally different but much more time-consuming to calculate. Others have shown a close relationship between gradient boosted decision trees and BART point estimates.<sup>7</sup>

The primary analysis uses these scores as an additional adjusting variable, making the procedure "doubly robust" in that it can produce low-bias estimates if either the outcome model or exposure model is well-specified.<sup>8</sup> Although the practical performance of doubly robust Bayesian regression which includes propensity scores is well known, the theoretical rationale is usually not clear.<sup>9</sup> In the case of BART, which performs well without modification for causal inference in many circumstances,<sup>10</sup> it can be viewed as a re-parameterization which more easily captures selection bias based on perceived risks.<sup>8,11</sup> Propagation of uncertainty in propensity was not used as it has not been shown to improve performance.<sup>9</sup> Cross-validation using an 80% subsample was used to select hyperparameters. This strategy empirically has low bias and total error for causal effects compared to multiple comparators.<sup>12</sup> A histogram of propensity to OSA is shown in eFigure 5.

BART is a Bayesian procedure and therefore produces credible intervals instead of confidence intervals. The credible interval is the area of the posterior with the highest density containing 99% of the probability for the calculated quantity. Because it is non-parametric, the prior is over the functional form of fitted surfaces in the form of splitting probabilities for decision trees, and the "prior" for treatment effects is only indirectly induced. The meaning of the BART prior has been discussed extensively elsewhere.<sup>10,11</sup> While there are guarantees of concordance between credible intervals and confidence intervals only in some specialized cases, others have observed that BART estimated treatment effects have good frequentist properties as well.<sup>12</sup>

The association of PAP with delirium was analyzed within OSA + patients only. Patients without OSA (not eligible for PAP therapy) remained excluded even if they used BPAP or CPAP for respiratory failure. The "PAP effect" therefore compares "OSA +, PAP-" to "OSA +, PAP +" and no interaction term is required. Because the OSA-restricted sample size is small and because PAP adherence was so frequently missing, we also experimented with adding a "missing" factor level and a term for missing included in the model and with including OSA - patients in the model. "Non-adherent" remained the reference level, and reported effects are for the "adherent vs non-adherent" contrast. Inclusion of these unknown exposure level observations does not directly contribute to the estimate; however, they have an indirect effect of stabilizing the estimated effects of covariates. Because the PAP+ patients are a subset of OSA+, no interaction term is required.

During the preparation of the manuscript, Hahn and colleagues released the bcf package implementing their methods. However, bcf did not accommodate binary outcomes, so the presented results use a customized BART 1.7 validated on the examples of Hill (data not shown).<sup>10</sup> The optmatch package performed matching; mice performed imputation, and the margins package estimated marginal effects for generalized linear models.

**eFigure 5.** Histogram of OSA Propensity Score by OSA Status in the Entire Surgical Population  
X-axis: log-odds of propensity to OSA. Y-axis: counts. Blue: yes OSA. Red: no OSA.

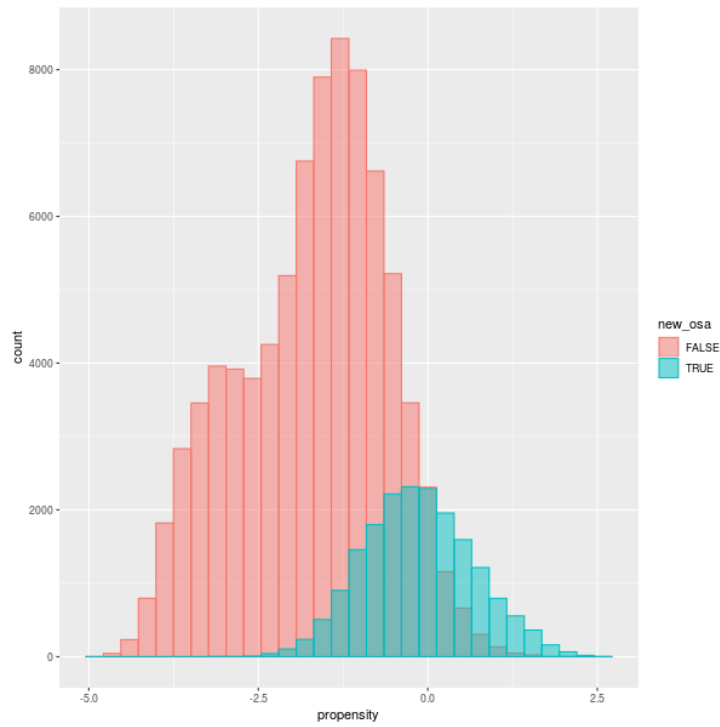

## **eAppendix 5. Sensitivity Analyses and Alternative Analytic Approaches**

We validated these calculations by comparison to other methods. These included propensity score matching with 1:1 optimal matching<sup>13</sup> using BART or logistic regression to generate scores instead of gradient boosting, adjustment for covariates in classic BART, classic BART plus propensity scores as a covariate, and logistic regression. We conducted several sensitivity analyses.

- 1) We performed imputation and estimated an alternative propensity score using the entire perioperative dataset with an indicator variable for non-ICU admission.
- 2) We restricted the analysis to only patients with pre-specified surgical service (an option field serving as a marker of a complete anesthesia assessment) or only patients whose evaluation was performed in preoperative clinic.
- 3) We added all patients otherwise meeting inclusion criteria but never CAM-ICU assessed as "negative," all as "positive," and with a random draw from fitted values from a model excluding OSA status.
- 4) We added patients otherwise meeting inclusion criteria but not admitted to the ICU with a "negative" value for delirium. These patients were selected using a nonparametric model of ICU admission (see above) and 1:1 matched to admitted patients with a similar propensity for admission (20 strata), the same OSA status, and the same CCS level-2 primary procedure code.
- 5) We excluded components of STOP-BANG (hypertension, gender, BMI, age) as covariates.
- 6) We imputed missing data without including outcomes as a covariable.
- 7) We defined the exposure as OSA *diagnosis* only (not using STOP-BANG).
- 8) We added potential mediators of an OSA-delirium relationship as covariates (intra- and postoperative benzodiazepine use, total intraoperative use opioid in oral morphine equivalents, postoperative ventilation, postoperative positive airway pressure use).
- 9) We evaluated a regression of STOP-BANG score versus postoperative delirium only among patients without an OSA diagnosis. Several of the covariates are components of STOP-BANG; the eAppendix 7 contains the effective contrasts being drawn when conditioning on BMI, age, sex, and history of hypertension. The effect of STOP-BANG was evaluated by comparison of fitted values counterfactually setting it to "0".

## **eAppendix 6. Hyperparameters, Tuning, and Variable Importance**

Duration of markov-chain monte carlo sampling was increased until Geweke diagnostics and autocorrelation-based effective sample sizes were found to be adequate. During tuning of OSA status prediction we used 20,000 posterior draws after a burn-in of 5,000 draws on a singly imputed dataset with an 80:20 cross validation split. During final propensity score calculation, we used 15,000 draws after a 5,000 burn in period for each of 30 imputed datasets. During PAP prediction tuning we used 50,000 posterior draws after a burn-in of 10,000. During BCF and BART prediction of delirium we used 30,000 posterior draws after a burn-in of 5,000 in each of 30 imputed datasets.

For the prediction of OSA status, cross-validation of AUROC selected the following BART parameters:  $k = 2.76$ ,  $n\_tree = 248$ . For the prediction of PAP adherence,  $k = 2.675$ ,  $n\_tree = 59$ . A sparse dirichlet prior made no meaningful improvement in AUROC (difference of .002) and substantially increased computing requirements. For predicting delirium with only the OSA propensity score, the optimal  $k$  was 3.1 and  $n\_tree$  was 15. For predicting delirium with BCF  $k = 2.15$  and  $n\_tree = 231$ ,  $ntree\_treated = 41$ . For pure BART predicting delirium  $k = 2.5$ ,  $n\_tree = 162$ .

We observed the results to not depend strongly on these parameters. We kept the power and base split probabilities at their default (2, 0.95). We observed minimal dependence of the effect estimates on hyperparameters. For example, using default parameters ( $k=2$ ,  $ntree=200$  or  $ntree=50$ ) did not change the point estimate for the effect of OSA by more than 0.01 but did change credible interval widths increasing them by up to 0.03.

Predictor relevance was assessed using loss in predictive accuracy when permuting the predictor, coverage probabilities, improvement in splitting, and mean absolute shapely value.<sup>14</sup>

For the matched analysis, we used 1:1 optimal matching with a caliper of 1 on the logistic scale. In order to successfully match all exposed, in the analysis of PAP adherence the caliper was increased to 1.5.

Propensity-adjusted sample comparisons and standardized differences were computed using inverse propensity weights.



## eAppendix 7. STOP-BANG Contrasts

Adjusting for covariates always explains away some of the exposure, but in the case where the exposure is a direct function of some covariates, the implicit contrast being drawn by the observed effect of the residual exposure is somewhat complicated.

Take the high-risk STOP-BANG screens as the clearest example. The goal is to compare outcome rates between patients with high risk screens and those without. Elements of the screen (PBAG=BMI, gender, hypertension, age) also have likely direct effects on the outcomes, and so we adjust them as if they were confounders. If we then say STOP-BANG > 4 is the threshold, the net contrasts being drawn are then within strata of PBAG using the number of other factors (SNOT = snoring, tiredness, observed, neck circumference)

PBAG = 0 : discard data (there are no STOP-BANG > 4)

PBAG = 1 : compare SNOT = 4 to SNOT ≤ 3

PBAG = 2 : compare SNOT > 2 to SNOT ≤ 2

PBAG = 3 : compare SNOT > 1 to SNOT ≤ 1

PBAG = 4 : compare SNOT > 0 to SNOT = 0

With the more complicated scheme that is now recommended the contrast is more convoluted (add the letter H for bicarb):

PBAG = 4 : compare SNOT > 0 to SNOT = 0 (H irrelevant)

{BG = 2 and P=0 and A=1} : compare {STO > 1} or {STO =1 and N} to {STO = 0} or {STO = 1 and N =0} (H irrelevant)

{BG = 2,1 and P=1 any A} : compare STO > 0 to STO = 0 (NH irrelevant)

{BG = 2 and P=0 and A=0} : compare STO > 1 to STO ≤ 1 (NH irrelevant)

{BG = 1 and P =0 any A} : compare STO > 1 to STO ≤ 1 (NH irrelevant)

{BG = 0 and P =1 and A =0} : compare {HN > 0 and STO >0} to {HN>0 and STO =0} and {HN=0}

{BG = 0 and P =1 and A =1} : compare {HN > 0 and STO >0} or {HN=0 and STO =3} to {HN>0 and STO =0} and {HN=0 and STO < 3}

{BG = 0 and P =0 any A} : compare {HN > 0 and STO >1} to {HN>0 and STO ≤1} and {HN=0}

**eTable 4.** Covariance and Marginal Distribution of STOP-BANG Elements  
Rounded to 2 digits.

Panel A: Among all preop evaluated patients:

|          | mean | Pressure | Snore | Observed | Tired | Neck  | BMI  | Gender | Age   |
|----------|------|----------|-------|----------|-------|-------|------|--------|-------|
| Pressure | 0.45 | 0.44     | 0.25  | 0.03     | 0.01  | 0.02  | 0.03 | 0.02   | 0.02  |
| Snore    | 0.33 | 0.33     | 0.03  | 0.22     | 0.03  | 0.04  | 0.03 | 0.03   | 0.02  |
| Observed | 0.07 | 0.07     | 0.01  | 0.03     | 0.06  | 0.02  | 0.01 | 0.01   | 0.01  |
| Tired    | 0.30 | 0.3      | 0.02  | 0.04     | 0.02  | 0.21  | 0.01 | 0.01   | -0.01 |
| Neck     | 0.22 | 0.22     | 0.03  | 0.03     | 0.01  | 0.01  | 0.17 | 0.06   | 0.05  |
| BMI      | 0.20 | 0.2      | 0.02  | 0.03     | 0.01  | 0.01  | 0.06 | 0.16   | -0.02 |
| Gender   | 0.48 | 0.48     | 0.02  | 0.02     | 0.01  | -0.01 | 0.05 | -0.02  | 0.25  |
| Age      | 0.66 | 0.64     | 0.09  | 0.02     | 0     | 0.01  | 0.01 | -0.01  | 0.02  |

Panel B: Among ICU patients. Final columns odds-ratio predicting delirium with 95% confidence interval from univariate GLM.

|   | mean | P    | S    | O    | T    | N     | B     | G     | A     | OR    | 95% ci |
|---|------|------|------|------|------|-------|-------|-------|-------|-------|--------|
| P | 0.58 | 0.59 | 0.24 | 0.03 | 0.01 | 0.02  | 0.03  | 0.02  | 0.02  | 0.04  | 1.07   |
| S | 0.37 | 0.37 | 0.03 | 0.23 | 0.04 | 0.03  | 0.04  | 0.03  | 0.02  | 0.01  | 0.99   |
| O | 0.09 | 0.09 | 0.01 | 0.04 | 0.08 | 0.02  | 0.01  | 0     | 0.01  | 0     | 1.03   |
| T | 0.37 | 0.37 | 0.02 | 0.03 | 0.02 | 0.23  | 0     | 0     | -0.02 | 0     | 1.04   |
| N | 0.24 | 0.25 | 0.03 | 0.04 | 0.01 | 0     | 0.19  | 0.08  | 0.05  | -0.01 | 0.98   |
| B | 0.2  | 0.19 | 0.02 | 0.03 | 0    | 0     | 0.08  | 0.15  | -0.01 | -0.01 | 1.01   |
| G | 0.57 | 0.58 | 0.02 | 0.02 | 0.01 | -0.02 | 0.05  | -0.01 | 0.24  | 0     | 1.01   |
| A | 0.80 | 0.8  | 0.04 | 0.01 | 0    | 0     | -0.01 | -0.01 | 0     | 0.16  | 1.05   |

**eTable 5.** Prevalence of OSA Diagnosis and Rate of Missing STOP-BANG Criteria by Surgical Category

Panel A: Patients not admitted to the ICU. # = number of cases, all other rounded to tenths of a percent. Age and gender never missing.

| Surgical service | #     | osa  | s    | t    | o    | p    | b   | n    | Total |
|------------------|-------|------|------|------|------|------|-----|------|-------|
| cardsurg         | 1056  | 26   | 54.3 | 53.2 | 57.9 | 52.6 | 0.9 | 79.3 | 23.1  |
| ent              | 2942  | 16.5 | 22.1 | 18.3 | 21.5 | 18.2 | 0.1 | 13.9 | 3.9   |
| general          | 4574  | 18.3 | 24.9 | 21.5 | 25.4 | 20.8 | 0.3 | 18.8 | 3.7   |
| gynecology       | 3871  | 14.1 | 16.8 | 12.8 | 17.1 | 12.2 | 0.2 | 6.6  | 0.5   |
| neurosurgery     | 3232  | 25.2 | 26.4 | 23.8 | 26.8 | 23.2 | 0.2 | 18.8 | 3.4   |
| orthopedic       | 5474  | 25.9 | 27.3 | 23.9 | 27.2 | 23.4 | 0.3 | 22.3 | 2.6   |
| thoracic         | 1957  | 15.4 | 22.5 | 20.4 | 22.7 | 19.8 | 0.1 | 19.1 | 4.8   |
| transplant       | 539   | 22.3 | 26.2 | 23.4 | 27.1 | 23.2 | 0.2 | 19.5 | 1.9   |
| unknown          | 11448 | 4.2  | 44.3 | 40.3 | 43.4 | 39.7 | 8   | 68.3 | 15.5  |
| urology          | 3948  | 21.6 | 23.2 | 19.2 | 22.8 | 18.5 | 0.2 | 8.9  | 0.4   |
| vascular         | 1457  | 16.3 | 23.5 | 21.1 | 25.5 | 19.7 | 0.1 | 25.3 | 2.3   |
| other            | 713   | 20.1 | 34.4 | 30.3 | 35.1 | 29.7 | 0.1 | 39.8 | 8.1   |

Panel B: Patients admitted to the ICU

| Surgical service | #    | osa  | s    | t    | o    | p    | b    | n    | Total |
|------------------|------|------|------|------|------|------|------|------|-------|
| cardsurg         | 1559 | 26.7 | 47.5 | 46.9 | 51.6 | 46   | 1.2  | 69   | 15.4  |
| general          | 473  | 24.5 | 28.5 | 25.6 | 30.4 | 25.2 | 1.1  | 22.8 | 6.1   |
| orthopedic       | 337  | 35   | 41.8 | 39.2 | 41.5 | 38.3 | 0.9  | 35.6 | 14.2  |
| thoracic         | 212  | 16   | 34.4 | 31.6 | 35.8 | 31.6 | 0.5  | 38.2 | 20.8  |
| unknown          | 1267 | 9.7  | 72.7 | 69.5 | 71.6 | 69.1 | 28.7 | 85.2 | 53.8  |
| vascular         | 234  | 22.2 | 39.7 | 37.2 | 38.9 | 34.6 | 1.3  | 33.3 | 9     |
| other            | 584  | 23.6 | 36   | 32.5 | 37.3 | 31.7 | 0.3  | 34.1 | 7.7   |

**eTable 6.** Comparison of Effect Estimates From Sensitivity Analyses

"-0.00" and "0.00" are negative and positive numbers rounding to 0 at 2 digits. If unstated analytic method doubly-robust BCF, number of imputations = 30. ATE= average treatment effect, ATT=average treatment effect on the treated, AME=average marginal effect.

Panel A: Sensitivity analyses for OSA effect.

| Analysis                             | Target | Estimate | 99% LB | 99% UB |
|--------------------------------------|--------|----------|--------|--------|
| Matched non-ICU -> negative delirium | ATE    | 0.01     | -0.02  | 0.04   |
| Matched non-ICU -> negative delirium | ATT    | 0.01     | -0.02  | 0.04   |
| Missing CAM = 0                      | ATE    | -0.01    | -0.04  | 0.03   |
| Missing CAM = 0                      | ATT    | -0.01    | -0.04  | 0.03   |
| Missing CAM = 1                      | ATE    | -0.01    | -0.04  | 0.03   |
| Missing CAM = 1                      | ATT    | -0.01    | -0.04  | 0.03   |
| Missing CAM ~ prob                   | ATE    | -0.00    | -0.04  | 0.03   |
| Missing CAM ~ prob                   | ATT    | -0.01    | -0.04  | 0.03   |
| Mediators included                   | ATE    | -0.03    | -0.06  | 0.01   |
| Mediators included                   | ATT    | -0.03    | -0.06  | 0.01   |
| No post-exposure in impute           | ATE    | -0.00    | -0.04  | 0.03   |
| No post-exposure in impute           | ATT    | -0.01    | -0.04  | 0.03   |
| Diagnosed OSA only                   | ATE    | -0.01    | -0.05  | 0.03   |
| Diagnosed OSA only                   | ATT    | -0.01    | -0.05  | 0.02   |
| Pre-screening only                   | ATE    | 0.02     | -0.04  | 0.08   |
| Pre-screening only                   | ATT    | 0.02     | -0.05  | 0.08   |
| Post-Screening Only                  | ATE    | -0.02    | -0.07  | 0.02   |
| Post-Screening Only                  | ATT    | -0.02    | -0.07  | 0.02   |
| No unk service                       | ATE    | -0.01    | -0.05  | 0.03   |
| No unk service                       | ATT    | -0.01    | -0.05  | 0.03   |
| Anest Clinic only                    | ATE    | 0.02     | -0.03  | 0.07   |
| Anest Clinic only                    | ATT    | 0.02     | -0.03  | 0.07   |
| Analysis plan full model             | ATT    | -0.01    | -0.05  | 0.03   |

|                                               |     |       |       |       |
|-----------------------------------------------|-----|-------|-------|-------|
| Unadjusted - BCF                              | ATE | -0.03 | -0.07 | -0.00 |
| Unadjusted - BCF                              | ATT | -0.04 | -0.07 | 0.00  |
| BCF Propensity only                           | ATE | 0.00  | -0.04 | 0.05  |
| BCF Propensity only                           | ATT | -0.00 | -0.04 | 0.04  |
| Full model                                    | ATE | -0.01 | -0.04 | 0.03  |
| Full model                                    | ATT | -0.01 | -0.04 | 0.03  |
| BCF No propensity                             | ATE | -0.01 | -0.04 | 0.03  |
| BCF No propensity                             | ATT | -0.01 | -0.04 | 0.03  |
| BART with propensity and covariables          | ATE | -0.00 | -0.03 | 0.02  |
| BART with covariables                         | ATE | -0.00 | -0.03 | c     |
| BCF limited covariables                       | ATE | -0.01 | -0.14 | 0.12  |
| BCF limited covariables                       | ATT | -0.01 | -0.14 | 0.12  |
| BART global propensity                        | ATE | -0.01 | -0.03 | 0.03  |
| Full model global propensity                  | ATE | -0.00 | -0.03 | 0.04  |
| BCF global propensity only                    | ATE | -0.00 | -0.04 | 0.05  |
| 1 impute BCF propensity only                  | ATE | 0.01  | -0.04 | 0.04  |
| 1 impute BCF propensity only                  | ATT | 0.01  | -0.03 | 0.04  |
| 1 impute full model                           | ATE | 0.01  | -0.04 | 0.04  |
| 1 impute full model                           | ATT | 0.01  | -0.03 | 0.04  |
| 1 impute BART covariables only                | ATE | -0.00 | -0.02 | 0.02  |
| 1 impute BCF no propensity                    | ATE | -0.00 | -0.03 | -0.03 |
| 1 impute BCF no propensity                    | ATT | -0.00 | -0.03 | -0.03 |
| 1 impute BCF limited covariables              | ATE | -0.00 | -0.11 | 0.11  |
| 1 impute BART with propensity and covariables | ATE | -0.00 | -0.02 | 0.02  |
| 1 impute BCF global propensity                | ATE | 0.01  | -0.04 | 0.05  |
| 1 impute BCF global propensity                | ATT | -0.01 | -0.03 | 0.05  |
| Propensity matched                            | ATT | -0.01 | -0.05 | 0.04  |
| Linear propensity matched                     | ATT | -0.00 | -0.06 | 0.05  |

|                           |     |       |       |      |
|---------------------------|-----|-------|-------|------|
| Logistic regression model | AME | -0.02 | -0.07 | 0.03 |
|---------------------------|-----|-------|-------|------|

Panel B: PAP effect models. Abbreviations as above

|                                      |     |       |       |      |
|--------------------------------------|-----|-------|-------|------|
| Unadjusted                           | ATT | 0.00  | -0.09 | 0.09 |
| BCF Propensity only                  | ATE | -0.03 | -0.12 | 0.07 |
| BCF Propensity only                  | ATT | -0.02 | -0.12 | 0.08 |
| Full model                           | ATE | -0.00 | -0.07 | 0.07 |
| Full model                           | ATT | -0.00 | -0.08 | 0.07 |
| BCF No propensity                    | ATE | -0.00 | -0.08 | 0.08 |
| BCF No propensity                    | ATT | -0.00 | -0.08 | 0.07 |
| BART with propensity and covariables | ATE | -0.00 | -0.07 | 0.06 |
| BART with covariables                | ATE | -0.00 | -0.06 | 0.07 |
| PAP linear model                     | AME | 0.01  | -0.06 | 0.08 |
| PAP linear propensity match          | ATT | -0.02 | -0.16 | 0.11 |
| PAP no augmentation                  | ATE | 0.00  | -0.09 | 0.08 |
| PAP no augment propensity only       | ATE | 0.00  | -0.09 | 0.08 |
| PAP full propensity match            | ATT | -0.02 | -0.13 | 0.10 |

Panel C: STOP-BANG effects, computed among those without an OSA diagnosis.

|                          |     |      |       |      |
|--------------------------|-----|------|-------|------|
| STOP-BANG BART           | AME | 0.00 | -0.04 | 0.06 |
| STOP-BANG logistic model | AME | 0.00 | -0.02 | 0.02 |
| STOP-BANG logistic model | IOR | 0.01 | -0.08 | 0.11 |

**eTable 7.** Logistic Regression Coefficients

Panel A: modeling CAM-ICU+. CCS categories omitted from model.

| <i>Predictors</i>          | <b>delirium ever</b> |             |                  |
|----------------------------|----------------------|-------------|------------------|
|                            | <i>Odds Ratios</i>   | <i>CI</i>   | <i>p</i>         |
| Historical preop only      | 1.11                 | 0.96 – 1.30 | 0.163            |
| Female sex                 | 1.03                 | 0.93 – 1.15 | 0.566            |
| FUNCTIONAL CAPACITY        | 1.29                 | 1.17 – 1.42 | <b>&lt;0.001</b> |
| History of HTN             | 0.94                 | 0.82 – 1.07 | 0.330            |
| History of CAD             | 0.83                 | 0.71 – 0.97 | <b>0.016</b>     |
| PRIOR MI                   | 1.21                 | 1.01 – 1.44 | <b>0.038</b>     |
| History of CHF             | 0.94                 | 0.80 – 1.10 | 0.428            |
| Diastolic Dysfunction      | 1.05                 | 0.87 – 1.26 | 0.619            |
| LVEF                       | 1.06                 | 1.01 – 1.11 | <b>0.031</b>     |
| History of Aortic stenosis | 0.91                 | 0.82 – 1.01 | 0.084            |
| History of AFIB            | 0.97                 | 0.81 – 1.16 | 0.728            |
| PPM ICD implanted          | 0.98                 | 0.81 – 1.20 | 0.871            |
| History of TIA or STROKE   | 0.94                 | 0.72 – 1.23 | 0.658            |
| History of PAD             | 1.36                 | 1.08 – 1.70 | <b>0.008</b>     |

|                            |      |             |              |
|----------------------------|------|-------------|--------------|
| History of DVT             | 1.28 | 1.04 – 1.57 | <b>0.020</b> |
| History of PE              | 0.98 | 0.72 – 1.32 | 0.883        |
| History of DM              | 1.07 | 0.92 – 1.23 | 0.389        |
| Outpatient Insulin use     | 1.09 | 0.89 – 1.34 | 0.411        |
| History of CKD             | 1.28 | 1.09 – 1.50 | <b>0.003</b> |
| History of Dialysis        | 1.00 | 0.86 – 1.18 | 0.958        |
| History of Pulm Htn        | 1.12 | 0.95 – 1.31 | 0.178        |
| History of COPD            | 1.10 | 0.95 – 1.27 | 0.216        |
| History of ASTHMA          | 1.00 | 0.82 – 1.22 | 0.999        |
| History of CIRRHOSIS       | 1.24 | 0.90 – 1.71 | 0.196        |
| History of CANCER          | 0.93 | 0.81 – 1.07 | 0.295        |
| History of GERD            | 0.92 | 0.82 – 1.04 | 0.192        |
| History of ANEMIA          | 1.06 | 0.94 – 1.21 | 0.347        |
| History of COOMBS POSITIVE | 0.64 | 0.45 – 0.93 | <b>0.018</b> |
| History of DEMENTIA        | 2.87 | 1.40 – 5.90 | <b>0.004</b> |
| SMOKING EVER               | 1.07 | 0.96 – 1.19 | 0.240        |
| PreOp Diastolic            | 0.99 | 0.93 – 1.05 | 0.657        |
| PreOp Systolic             | 1.02 | 0.96 – 1.08 | 0.582        |



|                            |      |             |                  |
|----------------------------|------|-------------|------------------|
| PreOp SpO2                 | 1.01 | 0.96 – 1.06 | 0.752            |
| PreOp HR                   | 1.22 | 1.16 – 1.28 | <b>&lt;0.001</b> |
| age                        | 1.26 | 1.18 – 1.34 | <b>&lt;0.001</b> |
| ASA2                       | 1.14 | 0.65 – 1.99 | 0.651            |
| ASA3                       | 1.55 | 0.89 – 2.71 | 0.119            |
| ASA4                       | 2.73 | 1.56 – 4.77 | <b>&lt;0.001</b> |
| ASA5                       | 4.55 | 2.33 – 8.88 | <b>&lt;0.001</b> |
| emergency                  | 1.47 | 1.25 – 1.74 | <b>&lt;0.001</b> |
| BMI                        | 0.95 | 0.90 – 1.00 | 0.057            |
| RACE: Black                | 1.14 | 0.94 – 1.39 | 0.192            |
| RACE: Other                | 1.35 | 1.10 – 1.65 | <b>0.004</b>     |
| Assessment Type: OTHER     | 1.40 | 1.15 – 1.70 | <b>0.001</b>     |
| Assessment Type: Inpatient | 1.52 | 1.30 – 1.78 | <b>&lt;0.001</b> |
| Surg_Type:<br>UNKNOWN      | 1.37 | 1.10 – 1.71 | <b>0.005</b>     |
| Surg_Type:<br>GENERAL      | 1.26 | 1.02 – 1.57 | <b>0.032</b>     |
| Surg_Type:<br>ORTHOPEDIC   | 1.95 | 1.54 – 2.46 | <b>&lt;0.001</b> |
| Surg_Type:<br>THORACIC     | 1.04 | 0.80 – 1.34 | 0.788            |

|                                      |      |             |                  |
|--------------------------------------|------|-------------|------------------|
| Surg_Type:<br>VASCULAR               | 1.00 | 0.76 – 1.32 | 0.987            |
| Surg_Type:<br>UROLOGY                | 1.55 | 1.09 – 2.20 | <b>0.015</b>     |
| Surg_Type:<br>OTHER                  | 1.79 | 1.27 – 2.51 | <b>0.001</b>     |
| Surg_Type:<br>NEUROSURGERY           | 2.49 | 1.74 – 3.58 | <b>&lt;0.001</b> |
| Surg_Type:<br>TRANSPLANT             | 1.12 | 0.74 – 1.69 | 0.587            |
| Surg_Type: ENT                       | 1.06 | 0.72 – 1.56 | 0.765            |
| Surg_Type:<br>GYNECOLOGY             | 2.07 | 1.31 – 3.27 | <b>0.002</b>     |
| OSA+Screen                           | 1.02 | 0.90 – 1.15 | 0.749            |
| Primary procedure risk strat index   | 1.12 | 1.00 – 1.26 | 0.051            |
| Secondary procedure risk strat index | 1.34 | 1.19 – 1.50 | <b>&lt;0.001</b> |
| ZTCA population                      | 1.00 | 1.00 – 1.00 | 0.386            |
| ZTCA urban                           | 1.00 | 0.99 – 1.02 | 0.623            |
| ZTCA black_percent                   | 1.00 | 1.00 – 1.00 | 0.971            |
| ZTCA asian_percent                   | 1.00 | 0.97 – 1.03 | 0.957            |
| ZTCA hispanic_percent                | 1.01 | 1.00 – 1.02 | 0.184            |
| ZTCA vacant_housing                  | 1.01 | 1.01 – 1.02 | <b>0.001</b>     |

|                       |       |             |              |
|-----------------------|-------|-------------|--------------|
| ZTCA employed_lodds   | 1.08  | 0.97 – 1.21 | 0.165        |
| ZTCA poverty_fraction | 1.00  | 0.99 – 1.01 | 0.801        |
| ZTCA ed_less_hs       | 0.31  | 0.09 – 1.07 | 0.063        |
| ZTCA ed_hs            | 2.84  | 1.25 – 6.43 | <b>0.013</b> |
| case_year2013         | 0.90  | 0.70 – 1.16 | 0.435        |
| case_year2014         | 0.83  | 0.64 – 1.07 | 0.148        |
| case_year2015         | 0.69  | 0.54 – 0.90 | <b>0.006</b> |
| case_year2016         | 0.69  | 0.53 – 0.90 | <b>0.007</b> |
| Observations          | 7792  |             |              |
| R <sup>2</sup> Tjur   | 0.126 |             |              |

Panel B: Modeling OSA

| <i>Predictors</i>     | <b>All periop</b>  |             |                  | <b>ICU_Admit</b>   |             |                  |
|-----------------------|--------------------|-------------|------------------|--------------------|-------------|------------------|
|                       | <i>Odds Ratios</i> | <i>CI</i>   | <i>p</i>         | <i>Odds Ratios</i> | <i>CI</i>   | <i>p</i>         |
| Historical preop only | 1.06               | 0.99 – 1.14 | 0.081            | 1.19               | 0.99 – 1.42 | 0.066            |
| Female sex            | 0.34               | 0.33 – 0.36 | <b>&lt;0.001</b> | 0.39               | 0.34 – 0.44 | <b>&lt;0.001</b> |

|                                  |      |             |                  |      |             |                  |
|----------------------------------|------|-------------|------------------|------|-------------|------------------|
| FUNCTIONAL CAPACITY              | 1.18 | 1.14 – 1.23 | <b>&lt;0.001</b> | 1.03 | 0.91 – 1.15 | 0.681            |
| History of HTN                   | 1.84 | 1.76 – 1.94 | <b>&lt;0.001</b> | 1.50 | 1.29 – 1.74 | <b>&lt;0.001</b> |
| History of CAD                   | 0.93 | 0.86 – 1.01 | 0.072            | 0.94 | 0.79 – 1.12 | 0.500            |
| History of PRIOR MI              | 1.06 | 0.96 – 1.16 | 0.251            | 0.94 | 0.77 – 1.14 | 0.536            |
| History of CHF                   | 1.09 | 0.99 – 1.19 | 0.078            | 0.97 | 0.81 – 1.17 | 0.758            |
| History of Diastolic Dysfunction | 1.16 | 1.03 – 1.29 | <b>0.010</b>     | 1.14 | 0.92 – 1.40 | 0.233            |
| LVEF                             | 1.04 | 1.01 – 1.08 | <b>0.011</b>     | 1.08 | 1.02 – 1.15 | <b>0.013</b>     |
| History of Aortic stenosis       | 0.93 | 0.85 – 1.02 | 0.144            | 1.00 | 0.89 – 1.13 | 0.962            |
| History of AFIB                  | 1.21 | 1.10 – 1.32 | <b>&lt;0.001</b> | 1.20 | 0.99 – 1.46 | 0.059            |
| History of PPM_ICD               | 1.29 | 1.15 – 1.44 | <b>&lt;0.001</b> | 1.54 | 1.24 – 1.91 | <b>&lt;0.001</b> |
| History of TIA or STROKE         | 1.11 | 0.99 – 1.25 | 0.069            | 0.83 | 0.61 – 1.11 | 0.205            |
| History of PAD                   | 0.99 | 0.89 – 1.10 | 0.837            | 0.95 | 0.74 – 1.21 | 0.663            |
| History of DVT                   | 0.98 | 0.90 – 1.06 | 0.557            | 1.02 | 0.81 – 1.29 | 0.840            |

|                            |      |             |                  |      |             |                  |
|----------------------------|------|-------------|------------------|------|-------------|------------------|
| History of PE              | 1.10 | 0.97 – 1.24 | 0.157            | 1.08 | 0.77 – 1.51 | 0.667            |
| History of DM              | 1.35 | 1.27 – 1.43 | <b>&lt;0.001</b> | 1.24 | 1.05 – 1.45 | <b>0.009</b>     |
| Outpatient Insulin use     | 1.07 | 0.98 – 1.16 | 0.153            | 1.05 | 0.83 – 1.32 | 0.690            |
| History of CKD             | 1.03 | 0.96 – 1.10 | 0.465            | 1.17 | 0.98 – 1.40 | 0.077            |
| History of Dialysis        | 1.10 | 1.03 – 1.19 | <b>0.007</b>     | 1.04 | 0.87 – 1.25 | 0.671            |
| History of Pulm Htn        | 1.21 | 1.10 – 1.33 | <b>&lt;0.001</b> | 1.43 | 1.19 – 1.71 | <b>&lt;0.001</b> |
| History of COPD            | 1.24 | 1.16 – 1.33 | <b>&lt;0.001</b> | 1.52 | 1.29 – 1.80 | <b>&lt;0.001</b> |
| History of ASTHMA          | 1.45 | 1.36 – 1.55 | <b>&lt;0.001</b> | 1.30 | 1.03 – 1.63 | <b>0.024</b>     |
| History of CIRRHOSIS       | 0.84 | 0.70 – 0.99 | <b>0.042</b>     | 0.95 | 0.66 – 1.37 | 0.789            |
| History of CANCER          | 0.92 | 0.88 – 0.97 | <b>0.002</b>     | 0.93 | 0.79 – 1.09 | 0.354            |
| History of GERD            | 1.40 | 1.34 – 1.46 | <b>&lt;0.001</b> | 1.46 | 1.28 – 1.66 | <b>&lt;0.001</b> |
| History of ANEMIA          | 0.97 | 0.92 – 1.02 | 0.280            | 1.11 | 0.96 – 1.29 | 0.166            |
| History of COOMBS POSITIVE | 1.06 | 0.90 – 1.24 | 0.482            | 0.99 | 0.65 – 1.51 | 0.965            |

|                     |      |             |                  |      |             |                  |
|---------------------|------|-------------|------------------|------|-------------|------------------|
| History of DEMENTIA | 0.84 | 0.66 – 1.07 | 0.150            | 1.46 | 0.72 – 2.94 | 0.291            |
| SMOKING_EVER        | 1.17 | 1.12 – 1.23 | <b>&lt;0.001</b> | 1.13 | 0.99 – 1.29 | 0.064            |
| PreOp Diastolic     | 1.04 | 1.01 – 1.07 | <b>0.012</b>     | 1.04 | 0.97 – 1.11 | 0.302            |
| PreOp Systolic      | 0.93 | 0.90 – 0.95 | <b>&lt;0.001</b> | 0.94 | 0.88 – 1.01 | 0.089            |
| PreOp SpO2          | 0.93 | 0.91 – 0.95 | <b>&lt;0.001</b> | 0.99 | 0.94 – 1.05 | 0.731            |
| PreOp HR            | 0.95 | 0.93 – 0.98 | <b>&lt;0.001</b> | 0.92 | 0.87 – 0.98 | <b>0.008</b>     |
| age                 | 1.41 | 1.37 – 1.46 | <b>&lt;0.001</b> | 1.33 | 1.22 – 1.45 | <b>&lt;0.001</b> |
| ASA2                | 1.76 | 1.50 – 2.06 | <b>&lt;0.001</b> | 1.39 | 0.48 – 4.03 | 0.540            |
| ASA3                | 2.04 | 1.72 – 2.42 | <b>&lt;0.001</b> | 1.59 | 0.55 – 4.57 | 0.393            |
| ASA4                | 2.07 | 1.72 – 2.50 | <b>&lt;0.001</b> | 1.53 | 0.53 – 4.42 | 0.435            |
| ASA5                | 1.75 | 1.19 – 2.57 | <b>0.004</b>     | 0.93 | 0.29 – 3.00 | 0.899            |
| emergency           | 1.00 | 0.90 – 1.12 | 0.964            | 1.20 | 0.97 – 1.48 | 0.097            |
| BMI                 | 2.49 | 2.43 – 2.55 | <b>&lt;0.001</b> | 2.66 | 2.48 – 2.85 | <b>&lt;0.001</b> |

|                                        |      |             |                |      |             |                |
|----------------------------------------|------|-------------|----------------|------|-------------|----------------|
| RACE: Black                            | 0.78 | 0.72 – 0.84 | < <b>0.001</b> | 0.90 | 0.70 – 1.15 | 0.383          |
| RACE: Other                            | 0.77 | 0.67 – 0.88 | < <b>0.001</b> | 0.74 | 0.56 – 0.98 | <b>0.034</b>   |
| RACE: Unknown                          | 0.98 | 0.79 – 1.21 | 0.829          |      |             |                |
| RACE: Asian                            | 0.71 | 0.53 – 0.97 | <b>0.030</b>   |      |             |                |
| Assessment type:DPAP<br>(holding area) | 0.53 | 0.41 – 0.68 | < <b>0.001</b> |      |             |                |
| Assessment type:DPAP<br>(on ward)      | 0.35 | 0.30 – 0.41 | < <b>0.001</b> |      |             |                |
| Assessment type: inpatient             | 0.50 | 0.46 – 0.54 | < <b>0.001</b> | 0.58 | 0.48 – 0.70 | < <b>0.001</b> |
| Assessment type:OTHER                  | 0.57 | 0.51 – 0.64 | < <b>0.001</b> | 0.45 | 0.35 – 0.58 | < <b>0.001</b> |
| surgery type:<br>ORTHOPEDIC            | 1.97 | 1.79 – 2.18 | < <b>0.001</b> | 2.08 | 1.59 – 2.72 | < <b>0.001</b> |
| surgery type:<br>GENERAL               | 1.23 | 1.11 – 1.37 | < <b>0.001</b> | 1.02 | 0.80 – 1.30 | 0.883          |
| surgery type:<br>UROLOGY               | 1.30 | 1.17 – 1.44 | < <b>0.001</b> | 0.59 | 0.40 – 0.88 | <b>0.010</b>   |

|                                      |      |             |        |      |             |       |
|--------------------------------------|------|-------------|--------|------|-------------|-------|
| surgery type:<br>GYNECOLOGY          | 1.02 | 0.90 – 1.14 | 0.776  | 0.84 | 0.48 – 1.50 | 0.561 |
| surgery type: ENT                    | 1.39 | 1.24 – 1.56 | <0.001 | 1.29 | 0.83 – 1.99 | 0.251 |
| surgery type:<br>CARDSURG            | 1.41 | 1.23 – 1.62 | <0.001 |      |             |       |
| surgery type:<br>NEUROSURGERY        | 2.40 | 2.14 – 2.70 | <0.001 | 1.55 | 1.03 – 2.32 | 0.033 |
| surgery type:<br>THORACIC            | 1.25 | 1.10 – 1.41 | <0.001 | 1.01 | 0.74 – 1.37 | 0.958 |
| surgery type:<br>VASCULAR            | 1.17 | 1.02 – 1.34 | 0.024  | 1.00 | 0.74 – 1.35 | 0.978 |
| surgery type:<br>TRANSPLANT          | 1.40 | 1.16 – 1.70 | 0.001  | 0.75 | 0.45 – 1.25 | 0.268 |
| surgery type: OTHER                  | 1.73 | 1.41 – 2.11 | <0.001 | 1.12 | 0.76 – 1.65 | 0.576 |
| surgery type:<br>PLASTIC             | 1.46 | 1.13 – 1.89 | 0.003  |      |             |       |
| Primary procedure risk strat index   | 0.97 | 0.94 – 1.01 | 0.193  | 0.93 | 0.81 – 1.07 | 0.297 |
| Secondary procedure risk strat index | 0.96 | 0.91 – 1.01 | 0.094  | 0.93 | 0.81 – 1.07 | 0.330 |



|                       |      |             |                  |      |                 |              |
|-----------------------|------|-------------|------------------|------|-----------------|--------------|
| ZTCA population       | 1.00 | 1.00 – 1.00 | 0.543            | 1.00 | 1.00 – 1.00     | 0.279        |
| ZTCA urban            | 0.99 | 0.99 – 1.00 | <b>0.027</b>     | 1.00 | 0.99 – 1.02     | 0.617        |
| ZTCA black_percent    | 1.00 | 1.00 – 1.00 | 0.629            | 0.99 | 0.99 – 1.00     | <b>0.028</b> |
| ZTCA asian_percent    | 1.00 | 0.99 – 1.01 | 0.625            | 1.00 | 0.97 – 1.03     | 0.943        |
| ZTCA hispanic_percent | 1.00 | 0.99 – 1.01 | 0.699            | 1.00 | 0.99 – 1.02     | 0.785        |
| ZTCA vacant_housing   | 0.99 | 0.99 – 1.00 | <b>&lt;0.001</b> | 0.99 | 0.98 – 1.00     | 0.247        |
| ZTCA employed_lodds   | 0.92 | 0.88 – 0.97 | <b>0.001</b>     | 0.85 | 0.74 – 0.97     | <b>0.014</b> |
| ZTCA poverty_fraction | 1.00 | 0.99 – 1.00 | 0.352            | 0.99 | 0.98 – 1.00     | 0.235        |
| ZTCA ed_less_hs       | 0.61 | 0.35 – 1.06 | 0.081            | 3.23 | 0.74 –<br>14.14 | 0.119        |
| ZTCA ed_hs            | 0.74 | 0.53 – 1.04 | 0.085            | 0.81 | 0.31 – 2.16     | 0.679        |
| case_year2013         | 1.07 | 0.96 – 1.20 | 0.235            | 1.10 | 0.78 – 1.53     | 0.596        |
| case_year2014         | 1.52 | 1.35 – 1.70 | <b>&lt;0.001</b> | 1.50 | 1.07 – 2.12     | <b>0.020</b> |
| case_year2015         | 1.82 | 1.62 – 2.05 | <b>&lt;0.001</b> | 1.56 | 1.11 – 2.20     | <b>0.010</b> |

|                          |       |             |                  |       |             |       |
|--------------------------|-------|-------------|------------------|-------|-------------|-------|
| case_year2016            | 1.75  | 1.55 – 1.97 | <b>&lt;0.001</b> | 1.40  | 0.98 – 1.99 | 0.063 |
| surgery type:<br>UNKNOWN |       |             |                  | 0.92  | 0.70 – 1.20 | 0.534 |
| Observations             | 72643 |             |                  | 7792  |             |       |
| R <sup>2</sup> Tjur      | 0.298 |             |                  | 0.271 |             |       |

Panel C: Predicting PAP adherence

|                       | <b>All periop</b>  |             |                  | <b>ICU_Admit</b>   |             |              |
|-----------------------|--------------------|-------------|------------------|--------------------|-------------|--------------|
| <i>Predictors</i>     | <i>Odds Ratios</i> | <i>CI</i>   | <i>p</i>         | <i>Odds Ratios</i> | <i>CI</i>   | <i>p</i>     |
| Historical preop only | 1.00               | 0.84 – 1.19 | 0.987            | 0.83               | 0.52 – 1.33 | 0.447        |
| Female sex            | 0.74               | 0.66 – 0.84 | <b>&lt;0.001</b> | 0.95               | 0.65 – 1.38 | 0.782        |
| FUNCTIONAL CAPACITY   | 0.86               | 0.78 – 0.95 | <b>0.004</b>     | 0.91               | 0.64 – 1.28 | 0.580        |
| History of HTN        | 0.98               | 0.86 – 1.11 | 0.740            | 0.68               | 0.45 – 1.04 | 0.074        |
| History of CAD        | 1.06               | 0.90 – 1.25 | 0.464            | 1.42               | 0.92 – 2.18 | 0.117        |
| History of PRIOR MI   | 0.75               | 0.62 – 0.91 | <b>0.003</b>     | 0.61               | 0.38 – 0.99 | <b>0.043</b> |
| History of CHF        | 1.13               | 0.95 – 1.35 | 0.167            | 1.36               | 0.87 – 2.12 | 0.175        |

|                                  |      |             |              |      |             |              |
|----------------------------------|------|-------------|--------------|------|-------------|--------------|
| History of Diastolic Dysfunction | 1.05 | 0.85 – 1.31 | 0.640        | 1.23 | 0.77 – 1.97 | 0.393        |
| LVEF                             | 1.01 | 0.94 – 1.09 | 0.717        | 0.94 | 0.80 – 1.10 | 0.421        |
| History of Aortic stenosis       | 0.78 | 0.63 – 0.96 | <b>0.016</b> | 1.00 | 0.74 – 1.36 | 0.975        |
| History of AFIB                  | 1.05 | 0.89 – 1.24 | 0.531        | 1.58 | 1.02 – 2.45 | <b>0.042</b> |
| History of PPM_ICD               | 0.99 | 0.80 – 1.23 | 0.943        | 0.76 | 0.46 – 1.27 | 0.292        |
| History of TIA or STROKE         | 0.74 | 0.58 – 0.93 | <b>0.011</b> | 1.18 | 0.56 – 2.47 | 0.661        |
| History of PAD                   | 0.73 | 0.58 – 0.93 | <b>0.010</b> | 0.81 | 0.43 – 1.52 | 0.502        |
| History of DVT                   | 0.87 | 0.73 – 1.04 | 0.122        | 0.92 | 0.55 – 1.53 | 0.744        |
| History of PE                    | 0.83 | 0.64 – 1.09 | 0.176        | 0.49 | 0.22 – 1.13 | 0.095        |
| History of DM                    | 0.95 | 0.84 – 1.07 | 0.403        | 0.79 | 0.55 – 1.15 | 0.218        |
| Outpatient Insulin use           | 0.94 | 0.80 – 1.11 | 0.479        | 1.07 | 0.67 – 1.70 | 0.770        |
| History of CKD                   | 0.88 | 0.76 – 1.03 | 0.107        | 1.19 | 0.78 – 1.82 | 0.410        |
| History of Dialysis              | 1.08 | 0.93 – 1.26 | 0.314        | 0.77 | 0.51 – 1.16 | 0.214        |

|                            |      |             |                  |      |             |       |
|----------------------------|------|-------------|------------------|------|-------------|-------|
| History of Pulm Htn        | 1.03 | 0.86 – 1.23 | 0.748            | 1.13 | 0.74 – 1.71 | 0.571 |
| History of COPD            | 1.02 | 0.88 – 1.18 | 0.774            | 1.35 | 0.93 – 1.97 | 0.119 |
| History of ASTHMA          | 1.09 | 0.95 – 1.24 | 0.216            | 1.02 | 0.64 – 1.63 | 0.938 |
| History of CIRRHOSIS       | 1.01 | 0.69 – 1.49 | 0.954            | 0.79 | 0.31 – 2.00 | 0.619 |
| History of CANCER          | 0.96 | 0.86 – 1.08 | 0.481            | 1.04 | 0.70 – 1.55 | 0.847 |
| History of GERD            | 0.94 | 0.85 – 1.04 | 0.256            | 0.95 | 0.69 – 1.31 | 0.757 |
| History of ANEMIA          | 0.76 | 0.68 – 0.85 | <b>&lt;0.001</b> | 0.92 | 0.63 – 1.33 | 0.645 |
| History of COOMBS POSITIVE | 0.94 | 0.65 – 1.34 | 0.719            | 0.96 | 0.37 – 2.45 | 0.929 |
| History of DEMENTIA        | 1.17 | 0.64 – 2.12 | 0.613            | 1.83 | 0.37 – 8.98 | 0.454 |
| SMOKING_EVER               | 0.84 | 0.75 – 0.94 | <b>0.002</b>     | 0.76 | 0.53 – 1.08 | 0.126 |
| PreOp Diastolic            | 0.95 | 0.89 – 1.02 | 0.146            | 1.06 | 0.88 – 1.29 | 0.540 |
| PreOp Systolic             | 0.99 | 0.93 – 1.06 | 0.791            | 0.92 | 0.76 – 1.10 | 0.340 |
| PreOp SpO2                 | 0.97 | 0.92 – 1.01 | 0.165            | 0.93 | 0.80 – 1.08 | 0.340 |

|                                        |      |             |                  |      |             |              |
|----------------------------------------|------|-------------|------------------|------|-------------|--------------|
| PreOp HR                               | 1.00 | 0.94 – 1.07 | 0.961            | 1.01 | 0.84 – 1.20 | 0.949        |
| age                                    | 1.26 | 1.16 – 1.38 | <b>&lt;0.001</b> | 1.24 | 0.95 – 1.62 | 0.119        |
| ASA2                                   | 1.15 | 0.48 – 2.73 | 0.759            |      |             |              |
| ASA3                                   | 1.11 | 0.46 – 2.67 | 0.817            | 0.87 | 0.41 – 1.83 | 0.708        |
| ASA4                                   | 1.37 | 0.56 – 3.38 | 0.494            | 0.68 | 0.30 – 1.54 | 0.355        |
| ASA5                                   | 1.20 | 0.30 – 4.75 | 0.795            | 0.48 | 0.06 – 3.91 | 0.495        |
| emergency                              | 0.72 | 0.50 – 1.03 | 0.074            | 0.85 | 0.44 – 1.65 | 0.636        |
| BMI                                    | 1.47 | 1.39 – 1.55 | <b>&lt;0.001</b> | 1.33 | 1.12 – 1.58 | <b>0.001</b> |
| RACE: Black                            | 0.69 | 0.57 – 0.83 | <b>&lt;0.001</b> | 0.80 | 0.42 – 1.54 | 0.509        |
| RACE: Other                            | 0.95 | 0.63 – 1.44 | 0.816            | 0.53 | 0.23 – 1.25 | 0.145        |
| RACE: Unknown                          | 0.53 | 0.29 – 0.98 | <b>0.042</b>     |      |             |              |
| RACE: Asian                            | 1.22 | 0.50 – 2.99 | 0.666            |      |             |              |
| Assessment type:DPAP<br>(holding area) | 1.27 | 0.61 – 2.62 | 0.520            |      |             |              |

|                                   |      |             |              |      |             |              |
|-----------------------------------|------|-------------|--------------|------|-------------|--------------|
| Assessment type:DPAP<br>(on ward) | 0.92 | 0.65 – 1.30 | 0.652        |      |             |              |
| Assessment type: inpatient        | 1.11 | 0.90 – 1.38 | 0.339        | 1.16 | 0.69 – 1.94 | 0.579        |
| Assessment type:OTHER             | 0.56 | 0.32 – 0.99 | <b>0.048</b> | 0.47 | 0.22 – 0.97 | <b>0.042</b> |
| Surg_Type:<br>ORTHOPEDIC          | 1.00 | 0.69 – 1.45 | 0.998        | 0.64 | 0.33 – 1.24 | 0.184        |
| Surg_Type:<br>GENERAL             | 0.84 | 0.58 – 1.21 | 0.347        | 0.51 | 0.28 – 0.93 | <b>0.028</b> |
| Surg_Type:<br>UROLOGY             | 1.01 | 0.69 – 1.47 | 0.974        | 0.63 | 0.22 – 1.85 | 0.402        |
| Surg_Type:<br>GYNECOLOGY          | 0.73 | 0.49 – 1.09 | 0.124        | 0.47 | 0.12 – 1.87 | 0.284        |
| Surg_Type: ENT                    | 0.77 | 0.52 – 1.16 | 0.210        | 0.90 | 0.34 – 2.37 | 0.828        |
| Surg_Type:<br>CARDSURG            | 1.28 | 0.83 – 1.96 | 0.262        |      |             |              |
| Surg_Type:<br>NEUROSURGERY        | 0.78 | 0.52 – 1.15 | 0.211        | 1.26 | 0.39 – 4.03 | 0.697        |
| Surg_Type:<br>THORACIC            | 1.14 | 0.76 – 1.72 | 0.527        | 0.87 | 0.40 – 1.90 | 0.730        |
| Surg_Type:<br>VASCULAR            | 1.02 | 0.66 – 1.57 | 0.927        | 0.94 | 0.43 – 2.04 | 0.871        |
| Surg_Type:<br>TRANSPLANT          | 0.81 | 0.49 – 1.36 | 0.428        | 0.65 | 0.17 – 2.45 | 0.525        |

|                                      |      |             |              |      |               |              |
|--------------------------------------|------|-------------|--------------|------|---------------|--------------|
| Surg_Type:<br>OTHER                  | 0.88 | 0.52 – 1.50 | 0.644        | 1.97 | 0.71 – 5.44   | 0.193        |
| Surg_Type:<br>PLASTIC                | 1.98 | 1.01 – 3.90 | <b>0.048</b> |      |               |              |
| Primary procedure risk strat index   | 1.00 | 0.91 – 1.10 | 0.980        | 0.92 | 0.61 – 1.38   | 0.682        |
| Secondary procedure risk strat index | 0.93 | 0.82 – 1.05 | 0.229        | 0.76 | 0.51 – 1.14   | 0.183        |
| ZTCA population                      | 1.00 | 1.00 – 1.00 | <b>0.009</b> | 1.00 | 1.00 – 1.00   | 0.197        |
| ZTCA urban                           | 1.00 | 0.98 – 1.01 | 0.610        | 1.06 | 1.00 – 1.11   | <b>0.032</b> |
| ZTCA black_percent                   | 1.01 | 1.00 – 1.01 | <b>0.007</b> | 1.00 | 0.99 – 1.01   | 0.979        |
| ZTCA asian_percent                   | 0.98 | 0.95 – 1.01 | 0.161        | 1.03 | 0.92 – 1.15   | 0.654        |
| ZTCA hispanic_percent                | 1.02 | 1.00 – 1.04 | <b>0.038</b> | 0.98 | 0.93 – 1.04   | 0.557        |
| ZTCA vacant_housing                  | 1.00 | 0.99 – 1.01 | 0.790        | 1.02 | 0.99 – 1.05   | 0.211        |
| ZTCA employed_lodds                  | 1.21 | 1.08 – 1.37 | <b>0.002</b> | 1.22 | 0.85 – 1.76   | 0.286        |
| ZTCA poverty_fraction                | 1.00 | 0.99 – 1.01 | 0.723        | 0.98 | 0.96 – 1.01   | 0.265        |
| ZTCA ed_less_hs                      | 0.13 | 0.03 – 0.53 | <b>0.004</b> | 4.98 | 0.10 – 248.31 | 0.421        |

|                       |       |             |       |       |              |       |
|-----------------------|-------|-------------|-------|-------|--------------|-------|
| ZTCA ed_hs            | 0.82  | 0.34 – 1.94 | 0.651 | 7.06  | 0.58 – 86.57 | 0.126 |
| case_year2013         | 0.97  | 0.73 – 1.30 | 0.853 | 0.83  | 0.31 – 2.22  | 0.712 |
| case_year2014         | 0.91  | 0.67 – 1.23 | 0.536 | 0.66  | 0.24 – 1.81  | 0.419 |
| case_year2015         | 0.87  | 0.64 – 1.18 | 0.365 | 0.54  | 0.20 – 1.46  | 0.224 |
| case_year2016         | 0.81  | 0.60 – 1.11 | 0.187 | 0.58  | 0.21 – 1.62  | 0.299 |
| Surg_Type:<br>UNKNOWN |       |             |       | 0.68  | 0.24 – 1.94  | 0.474 |
| Observations          | 7231  |             |       | 849   |              |       |
| R <sup>2</sup> Tjur   | 0.077 |             |       | 0.141 |              |       |



**eTable 8.** Variable Importance Metrics for Propensity Models

Panel A permutes each variable to simulate the null distribution and displays the change in out of sample AUROC resulting from the loss of information. "Delta" column normalized to out-of-sample full model. Not all variables always included in model, row omitted in that case. Large negative deltas indicate an important variable. Rows with positive delta (model performs better scrambling them) omitted.

Panel A

Out of Sample AUROC when permuting predictors, outcome of OSA and PAP adherence

| OSA Model                |       |         | PAP Model                |       |         |
|--------------------------|-------|---------|--------------------------|-------|---------|
| names                    | auroc | delta   | names                    | auroc | delta   |
| Baseline (in sample)     | 0.875 | 0.0003  | Baseline (in sample)     | 0.679 | 0.0711  |
| Baseline (out of sample) | 0.875 | 0       | Baseline (out of sample) | 0.608 | 0       |
| WEIGHT                   | 0.762 | -0.1121 | BMI                      | 0.552 | -0.0559 |
| before_screening         | 0.788 | -0.0869 | SEX                      | 0.601 | -0.0072 |
| HTN                      | 0.857 | -0.0172 | RACE                     | 0.602 | -0.0063 |
| SEX                      | 0.859 | -0.0158 | Age_at_DoS               | 0.604 | -0.0038 |
| Surg_Type                | 0.86  | -0.0148 | SMOKING_EVER             | 0.605 | -0.0028 |
| Age_at_DoS               | 0.864 | -0.0106 | ccs_factor               | 0.606 | -0.0024 |
| HEIGHT                   | 0.866 | -0.0083 | WEIGHT                   | 0.606 | -0.0023 |
| GERD                     | 0.869 | -0.0061 | Surg_Type                | 0.606 | -0.0022 |
| ASA                      | 0.871 | -0.0039 | Pain                     | 0.606 | -0.0018 |
| DM                       | 0.871 | -0.0034 | LVEF                     | 0.606 | -0.0017 |
| ccs_factor               | 0.873 | -0.0019 | acs_poverty_fraction     | 0.607 | -0.0014 |
| RACE                     | 0.873 | -0.0018 | acs_employed_fraction    | 0.607 | -0.0011 |

|                        |       |         |                 |       |         |
|------------------------|-------|---------|-----------------|-------|---------|
| CANCER_HX              | 0.873 | -0.0014 | CKD             | 0.607 | -0.0011 |
| ASTHMA                 | 0.873 | -0.0014 | PreOp_Diastolic | 0.608 | -0.0004 |
| SMOKING_EVER           | 0.874 | -0.0011 | case_year       | 0.608 | -0.0001 |
| FUNCTIONAL_CAPACITY    | 0.874 | -0.0008 |                 |       |         |
| COPD                   | 0.874 | -0.0006 |                 |       |         |
| CHF                    | 0.874 | -0.0005 |                 |       |         |
| PHTN                   | 0.874 | -0.0004 |                 |       |         |
| PPM_ICD                | 0.874 | -0.0004 |                 |       |         |
| CAD                    | 0.874 | -0.0004 |                 |       |         |
| case_year              | 0.874 | -0.0003 |                 |       |         |
| AFIB                   | 0.874 | -0.0003 |                 |       |         |
| CCI                    | 0.874 | -0.0002 |                 |       |         |
| LVEF                   | 0.875 | -0.0001 |                 |       |         |
| acs_ed_college         | 0.875 | -0.0001 |                 |       |         |
| CHF_Diastolic_Function | 0.875 | -0.0001 |                 |       |         |
| acs_white_percent      | 0.875 | -0.0001 |                 |       |         |
| acs_ed_less_hs         | 0.875 | -0.0001 |                 |       |         |
| acs_black_percent      | 0.875 | -0.0001 |                 |       |         |

Panel B

Influence measures from gradient boosted decision trees. Predicting PAP

|    | <b>Feature</b>     | <b>Gain</b> | <b>Cover</b> | <b>Frequency</b> | <b>shap</b> |
|----|--------------------|-------------|--------------|------------------|-------------|
| 1  | WEIGHT             | 0.136       | 0.056        | 0.057            | 0.113       |
| 2  | ed_less_hs         | 0.08        | 0.054        | 0.057            | 0.214       |
| 3  | BMI                | 0.078       | 0.064        | 0.072            | 0.34        |
| 4  | Age                | 0.058       | 0.046        | 0.048            | 0.171       |
| 5  | Risk strat index 1 | 0.052       | 0.068        | 0.067            | 0.096       |
| 6  | employed_lodds     | 0.045       | 0.056        | 0.057            | 0.13        |
| 7  | hispanic_percent   | 0.042       | 0.044        | 0.043            | 0.098       |
| 8  | urban_lodds        | 0.039       | 0.049        | 0.048            | 0.09        |
| 9  | ANEMIA             | 0.038       | 0.008        | 0.005            | 0.135       |
| 10 | Risk strat index 2 | 0.031       | 0.047        | 0.048            | 0.063       |
| 11 | CCI                | 0.031       | 0.026        | 0.029            | 0.118       |
| 12 | vacant_housing     | 0.028       | 0.038        | 0.038            | 0.052       |
| 13 | PreOp_Systolic     | 0.027       | 0.035        | 0.033            | 0.111       |
| 14 | black_percent      | 0.025       | 0.028        | 0.033            | 0.093       |
| 15 | PreOp_Diastolic    | 0.025       | 0.036        | 0.029            | 0.11        |
| 16 | PreOp.HR           | 0.023       | 0.024        | 0.029            | 0.055       |
| 17 | ed_college         | 0.022       | 0.039        | 0.038            | 0.092       |

|    |                      |       |       |       |       |
|----|----------------------|-------|-------|-------|-------|
| 18 | white_percent        | 0.018 | 0.028 | 0.024 | 0.058 |
| 19 | SEX                  | 0.017 | 0.016 | 0.019 | 0.135 |
| 20 | Total.               | 0.017 | 0.04  | 0.033 | 0.085 |
| 21 | poverty_fraction     | 0.016 | 0.026 | 0.024 | 0.051 |
| 22 | ed_hs                | 0.015 | 0.032 | 0.029 | 0.059 |
| 23 | CANCER_HX            | 0.014 | 0.017 | 0.019 | 0.029 |
| 24 | SMOKING_EVER         | 0.012 | 0.007 | 0.01  | 0.076 |
| 25 | RACEBlack            | 0.011 | 0.008 | 0.005 | 0.057 |
| 26 | before_screeningTRUE | 0.011 | 0.003 | 0.005 | 0.042 |
| 27 | asian_percent        | 0.009 | 0.011 | 0.01  | 0.052 |
| 28 | ASA                  | 0.009 | 0.007 | 0.005 | 0.05  |
| 29 | FUNCTIONAL_CAPACITY  | 0.008 | 0.006 | 0.005 | 0.062 |
| 30 | DM                   | 0.007 | 0.004 | 0.005 | 0.047 |
| 31 | neval_valid          | 0.007 | 0.005 | 0.01  | 0.056 |
| 32 | case_year2013        | 0.007 | 0.011 | 0.01  | 0.019 |
| 33 | CHF                  | 0.006 | 0.006 | 0.005 | 0.04  |
| 34 | CAD_PRIORMI          | 0.006 | 0.007 | 0.005 | 0.04  |
| 35 | blank_preop          | 0.005 | 0.003 | 0.005 | 0.035 |
| 36 | Surg_TypeUROLOGY     | 0.004 | 0.006 | 0.005 | 0.033 |

|    |                  |       |       |       |       |
|----|------------------|-------|-------|-------|-------|
| 37 | GERD             | 0.004 | 0.003 | 0.005 | 0.026 |
| 38 | RACEWhite        | 0.003 | 0.005 | 0.005 | 0.028 |
| 39 | CKD              | 0.003 | 0.007 | 0.005 | 0.036 |
| 40 | Surg_TypeGENERAL | 0.003 | 0.007 | 0.005 | 0.032 |
| 41 | case_year2016    | 0.003 | 0.006 | 0.005 | 0.031 |
| 42 | HTN              | 0.002 | 0.004 | 0.005 | 0.022 |
| 43 | case_year2015    | 0.002 | 0.006 | 0.005 | 0.027 |
| 44 | PreOp.SpO2       | 0.001 | 0.003 | 0.005 | 0.018 |

#### Predicting Delirium

|   | <b>Feature</b>     | <b>Gain</b> | <b>Cover</b> | <b>Frequency</b> | <b>shap</b> |
|---|--------------------|-------------|--------------|------------------|-------------|
| 1 | ccs_factor_216     | 0.144       | 0.033        | 0.018            | 0.221       |
| 2 | ASA                | 0.105       | 0.036        | 0.026            | 0.279       |
| 3 | PreOp.HR           | 0.074       | 0.051        | 0.055            | 0.174       |
| 4 | Risk strat index 1 | 0.059       | 0.082        | 0.089            | 0.104       |
| 5 | emergency          | 0.049       | 0.018        | 0.011            | 0.146       |
| 6 | Risk strat index 2 | 0.042       | 0.065        | 0.059            | 0.1         |
| 7 | Age                | 0.037       | 0.053        | 0.048            | 0.182       |
| 8 | ccs_factor_34      | 0.036       | 0.015        | 0.007            | 0.066       |

|    |                      |       |       |       |       |
|----|----------------------|-------|-------|-------|-------|
| 9  | FUNCTIONAL_CAPACITY  | 0.032 | 0.018 | 0.018 | 0.128 |
| 10 | vacant_housing       | 0.026 | 0.046 | 0.041 | 0.122 |
| 11 | white_percent        | 0.024 | 0.035 | 0.044 | 0.098 |
| 12 | WEIGHT               | 0.023 | 0.032 | 0.044 | 0.048 |
| 13 | Total.               | 0.021 | 0.03  | 0.041 | 0.047 |
| 14 | BMI                  | 0.02  | 0.037 | 0.041 | 0.083 |
| 15 | ed_less_hs           | 0.02  | 0.024 | 0.033 | 0.056 |
| 16 | PreOp_Diastolic      | 0.019 | 0.025 | 0.022 | 0.08  |
| 17 | employed_lodds       | 0.018 | 0.027 | 0.033 | 0.036 |
| 18 | before_screeningTRUE | 0.017 | 0.012 | 0.015 | 0.079 |
| 19 | black_percent        | 0.015 | 0.019 | 0.022 | 0.078 |
| 20 | PreOp.SpO2           | 0.015 | 0.016 | 0.018 | 0.039 |
| 21 | PreOp_Systolic       | 0.015 | 0.026 | 0.022 | 0.06  |
| 22 | ed_college           | 0.015 | 0.026 | 0.033 | 0.045 |
| 23 | urban_lodds          | 0.013 | 0.027 | 0.026 | 0.065 |
| 24 | PAP_TypeOTHER        | 0.013 | 0.012 | 0.015 | 0.065 |
| 25 | PAP_TypeIPAP         | 0.012 | 0.012 | 0.015 | 0.069 |
| 26 | asian_percent        | 0.012 | 0.01  | 0.018 | 0.024 |
| 27 | CKD                  | 0.012 | 0.01  | 0.007 | 0.043 |

|    |                     |       |       |       |       |
|----|---------------------|-------|-------|-------|-------|
| 28 | CCI                 | 0.012 | 0.019 | 0.015 | 0.055 |
| 29 | poverty_fraction    | 0.011 | 0.011 | 0.018 | 0.029 |
| 30 | hispanic_percent    | 0.009 | 0.012 | 0.018 | 0.025 |
| 31 | ccs_factor_50       | 0.006 | 0.004 | 0.004 | 0.026 |
| 32 | ed_hs               | 0.006 | 0.012 | 0.011 | 0.031 |
| 33 | ccs_factor_49       | 0.006 | 0.01  | 0.007 | 0.038 |
| 34 | ccs_factor_44       | 0.006 | 0.019 | 0.011 | 0.039 |
| 35 | RACEWhite           | 0.005 | 0.009 | 0.007 | 0.034 |
| 36 | Surg_TypeORTHOPEDIC | 0.005 | 0.012 | 0.007 | 0.025 |
| 37 | case_year2015       | 0.004 | 0.008 | 0.007 | 0.036 |
| 38 | neval_valid         | 0.004 | 0.003 | 0.004 | 0.022 |
| 39 | CANCER_HX           | 0.004 | 0.011 | 0.007 | 0.038 |
| 40 | ccs_factor_176      | 0.004 | 0.007 | 0.004 | 0.017 |
| 41 | GERD                | 0.004 | 0.009 | 0.007 | 0.036 |
| 42 | DM                  | 0.003 | 0.008 | 0.007 | 0.026 |
| 43 | SMOKING_EVER        | 0.003 | 0.001 | 0.004 | 0.013 |
| 44 | HTN                 | 0.003 | 0.006 | 0.004 | 0.029 |
| 45 | ccs_factor_158      | 0.003 | 0.006 | 0.004 | 0.013 |
| 46 | DVT                 | 0.002 | 0.007 | 0.004 | 0.014 |

|    |                  |       |       |       |       |
|----|------------------|-------|-------|-------|-------|
| 47 | ccs_factor_222   | 0.002 | 0.007 | 0.004 | 0.014 |
| 48 | Surg_TypeUNKNOWN | 0.002 | 0.002 | 0.004 | 0.012 |
| 49 | CHF              | 0.002 | 0.004 | 0.004 | 0.016 |
| 50 | CAD              | 0.002 | 0.007 | 0.004 | 0.022 |
| 51 | ANEMIA           | 0.002 | 0.004 | 0.004 | 0.014 |
| 52 | blank_preop      | 0.001 | 0.007 | 0.004 | 0.023 |
| 53 | SEX              | 0.001 | 0.001 | 0.004 | 0.008 |

#### Predicting OSA

|   | <b>Feature</b>       | <b>Gain</b> | <b>Cover</b> | <b>Frequency</b> | <b>shap</b> |
|---|----------------------|-------------|--------------|------------------|-------------|
| 1 | WEIGHT               | 0.245       | 0.076        | 0.072            | 0.32        |
| 2 | BMI                  | 0.116       | 0.096        | 0.094            | 0.554       |
| 3 | HTN                  | 0.104       | 0.014        | 0.016            | 0.285       |
| 4 | Age                  | 0.053       | 0.031        | 0.028            | 0.287       |
| 5 | before_screeningTRUE | 0.05        | 0.018        | 0.016            | 0.297       |
| 6 | Risk strat index 1   | 0.037       | 0.071        | 0.063            | 0.151       |
| 7 | GERD                 | 0.027       | 0.011        | 0.016            | 0.185       |
| 8 | employed_lodds       | 0.025       | 0.045        | 0.06             | 0.095       |
| 9 | Risk strat index 2   | 0.02        | 0.048        | 0.047            | 0.094       |



|    |                  |       |       |       |       |
|----|------------------|-------|-------|-------|-------|
| 10 | SEX              | 0.019 | 0.029 | 0.022 | 0.332 |
| 11 | PAP_TypeIPAP     | 0.018 | 0.016 | 0.019 | 0.175 |
| 12 | hispanic_percent | 0.016 | 0.027 | 0.031 | 0.102 |
| 13 | ed_hs            | 0.016 | 0.034 | 0.041 | 0.09  |
| 14 | PreOp_Systolic   | 0.015 | 0.035 | 0.038 | 0.062 |
| 15 | PPM_ICD          | 0.015 | 0.006 | 0.003 | 0.077 |
| 16 | PreOp.HR         | 0.014 | 0.033 | 0.038 | 0.087 |
| 17 | ed_less_hs       | 0.014 | 0.025 | 0.025 | 0.095 |
| 18 | PAP_TypeOTHER    | 0.013 | 0.011 | 0.009 | 0.15  |
| 19 | PreOp_Diastolic  | 0.013 | 0.033 | 0.034 | 0.06  |
| 20 | blank_preop      | 0.013 | 0.004 | 0.003 | 0.089 |
| 21 | COPD             | 0.013 | 0.015 | 0.009 | 0.127 |
| 22 | asian_percent    | 0.013 | 0.033 | 0.031 | 0.07  |
| 23 | white_percent    | 0.012 | 0.024 | 0.028 | 0.087 |
| 24 | ed_college       | 0.012 | 0.022 | 0.028 | 0.07  |
| 25 | black_percent    | 0.011 | 0.029 | 0.028 | 0.078 |
| 26 | urban_lodds      | 0.01  | 0.019 | 0.022 | 0.091 |
| 27 | Total.           | 0.009 | 0.017 | 0.022 | 0.062 |
| 28 | vacant_housing   | 0.009 | 0.022 | 0.022 | 0.077 |

|    |                     |       |       |       |       |
|----|---------------------|-------|-------|-------|-------|
| 29 | poverty_fraction    | 0.009 | 0.023 | 0.022 | 0.087 |
| 30 | PHTN                | 0.008 | 0.01  | 0.006 | 0.095 |
| 31 | Surg_TypeUNKNOWN    | 0.008 | 0.002 | 0.003 | 0.035 |
| 32 | PreOp.SpO2          | 0.008 | 0.015 | 0.016 | 0.066 |
| 33 | CCI                 | 0.004 | 0.014 | 0.013 | 0.064 |
| 34 | RACEWhite           | 0.004 | 0.007 | 0.006 | 0.074 |
| 35 | DM                  | 0.004 | 0.007 | 0.006 | 0.072 |
| 36 | ccs_factor_43       | 0.003 | 0.009 | 0.006 | 0.018 |
| 37 | SMOKING_EVER        | 0.003 | 0.004 | 0.006 | 0.06  |
| 38 | neval_valid         | 0.003 | 0.01  | 0.009 | 0.034 |
| 39 | ccs_factor_61       | 0.002 | 0.005 | 0.003 | 0.036 |
| 40 | ccs_factor_50       | 0.002 | 0.007 | 0.006 | 0.045 |
| 41 | ASA                 | 0.002 | 0.001 | 0.003 | 0.023 |
| 42 | ccs_factor_216      | 0.001 | 0.005 | 0.003 | 0.029 |
| 43 | CKD                 | 0.001 | 0.004 | 0.003 | 0.028 |
| 44 | CAD_PRIORMI         | 0.001 | 0.005 | 0.003 | 0.027 |
| 45 | emergency           | 0.001 | 0.005 | 0.003 | 0.031 |
| 46 | case_year2013       | 0.001 | 0.005 | 0.003 | 0.033 |
| 47 | FUNCTIONAL_CAPACITY | 0.001 | 0.005 | 0.003 | 0.031 |

|    |                  |       |       |       |       |
|----|------------------|-------|-------|-------|-------|
| 48 | Surg_TypeGENERAL | 0.001 | 0.005 | 0.003 | 0.022 |
| 49 | ANEMIA           | 0.001 | 0.005 | 0.003 | 0.031 |
| 50 | CANCER_HX        | 0.001 | 0.004 | 0.003 | 0.021 |

**eAppendix 8.** Propensity Score Balance Diagnostics

Empirical cumulative distribution plots for raw sample (left) and OSA propensity score reweighted sample (right) stratified by OSA plus high risk screen status. Y-axis is the fraction of observed data below the threshold, x-axis is a threshold value of the variable of interest. Non-informative confounding variables gives overlapping curves.

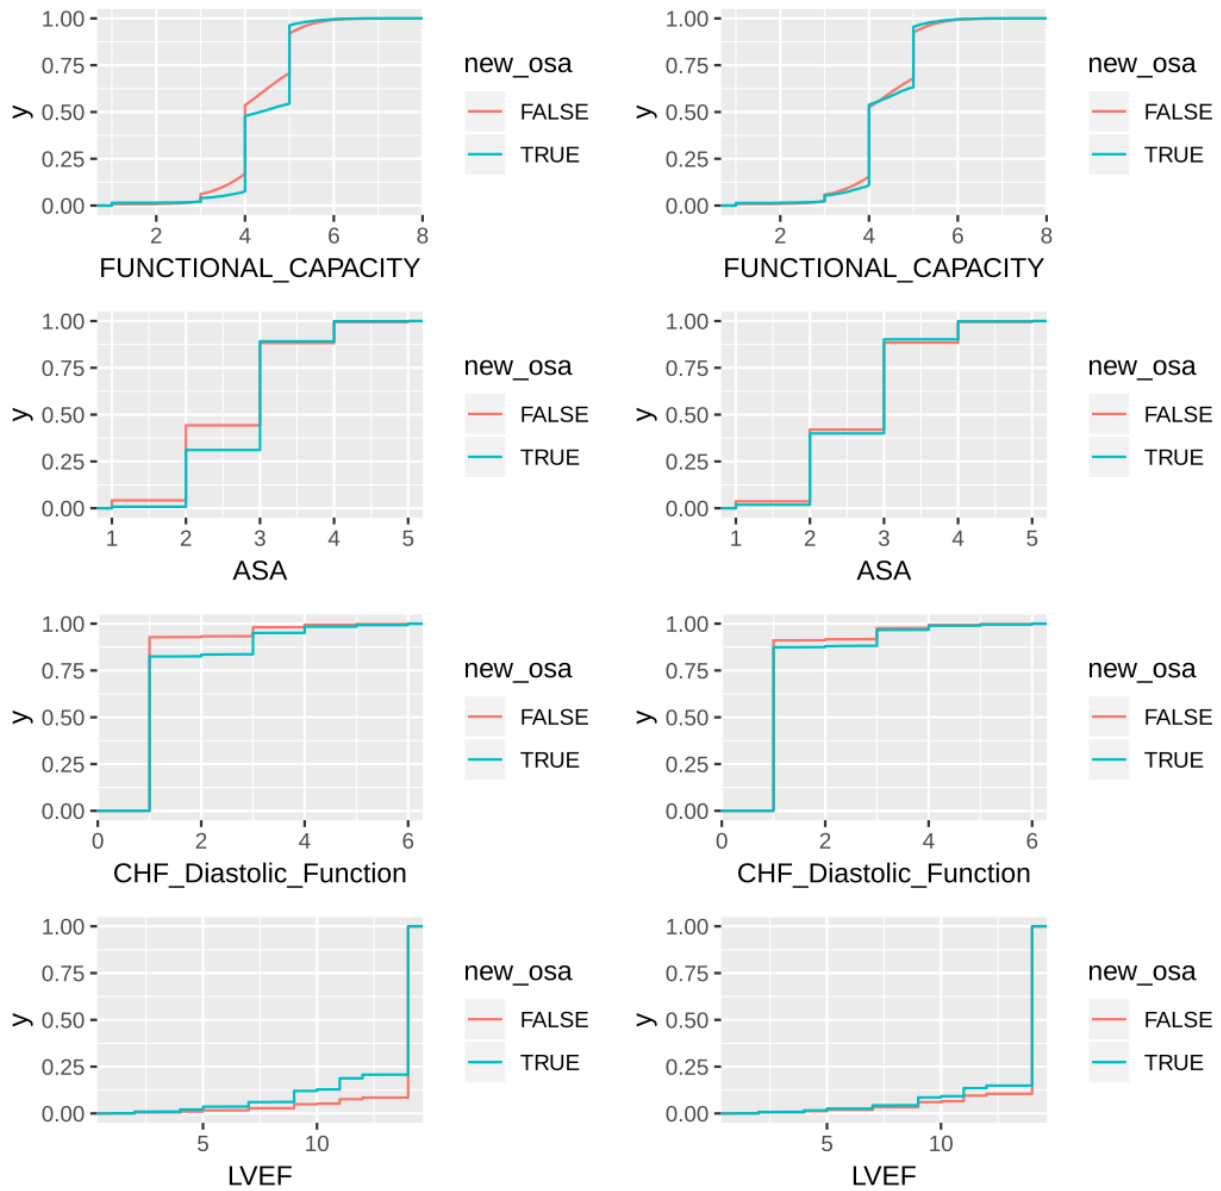

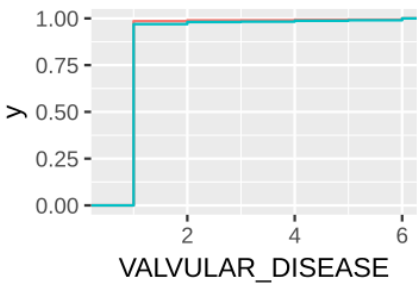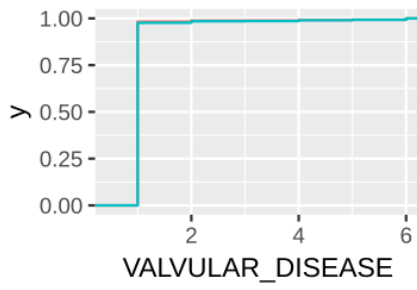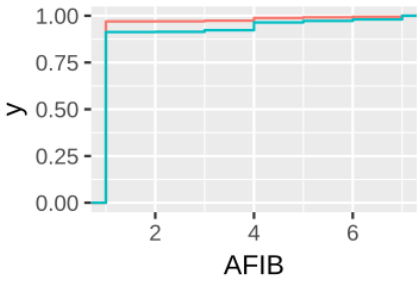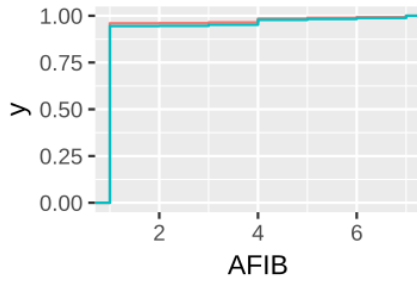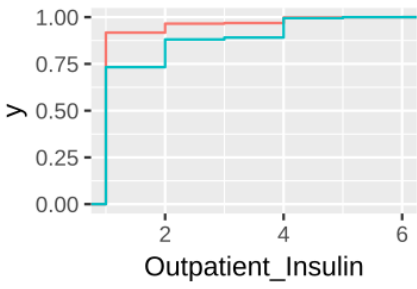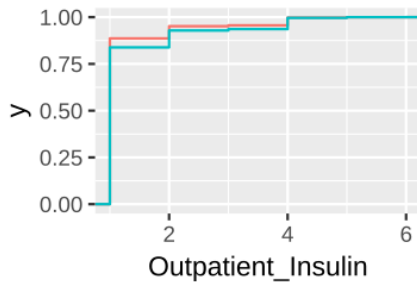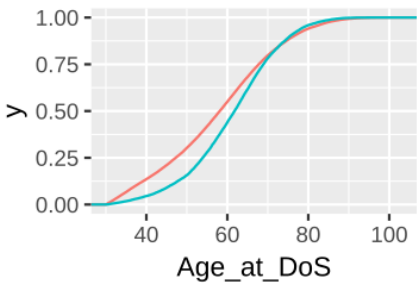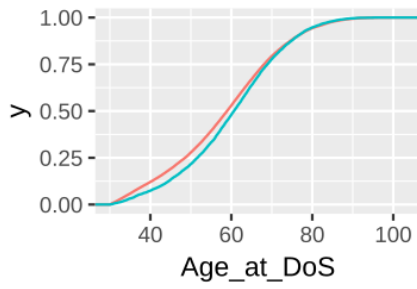

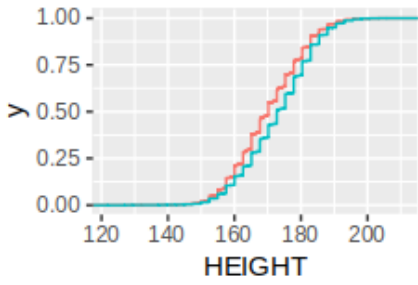

new\_osa  
 — FALSE  
 — TRUE

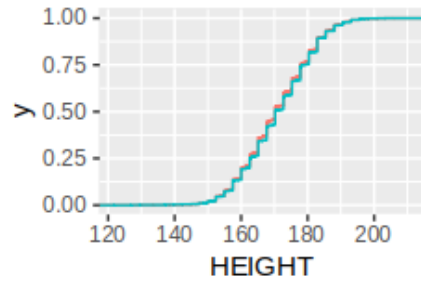

new\_osa  
 — FALSE  
 — TRUE

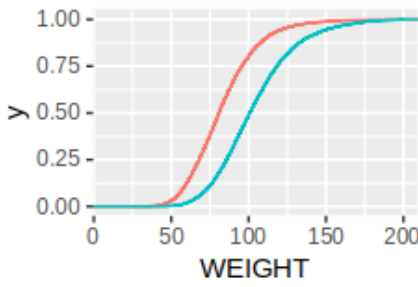

new\_osa  
 — FALSE  
 — TRUE

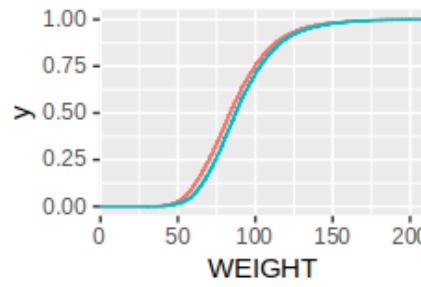

new\_osa  
 — FALSE  
 — TRUE

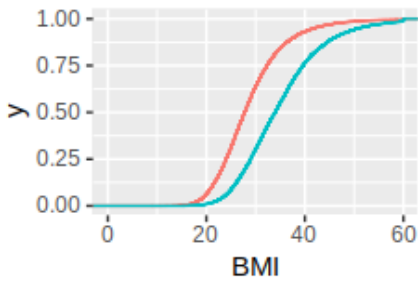

new\_osa  
 — FALSE  
 — TRUE

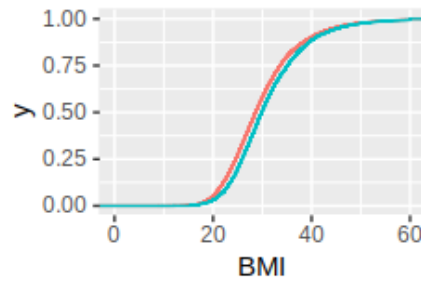

new\_osa  
 — FALSE  
 — TRUE

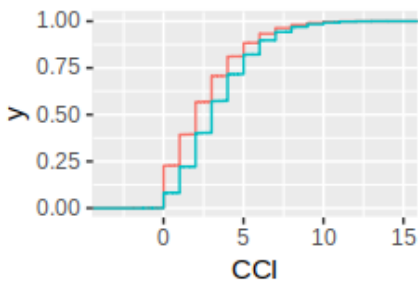

new\_osa  
 — FALSE  
 — TRUE

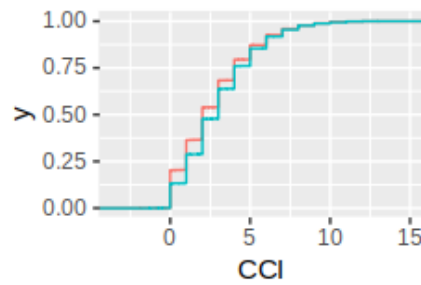

new\_osa  
 — FALSE  
 — TRUE

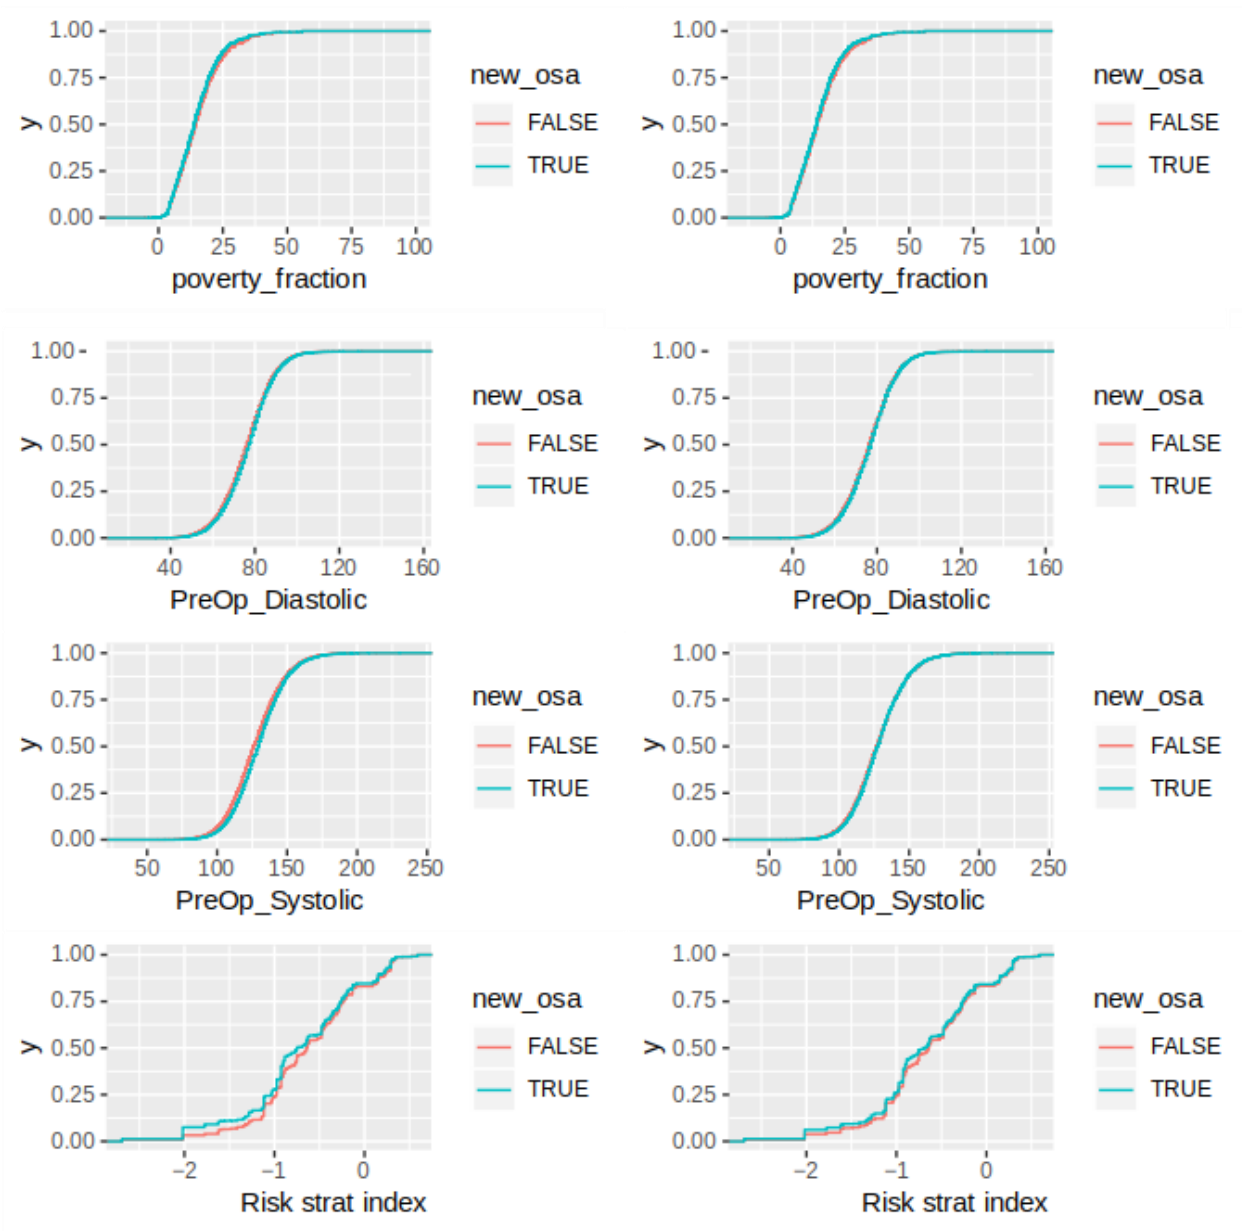

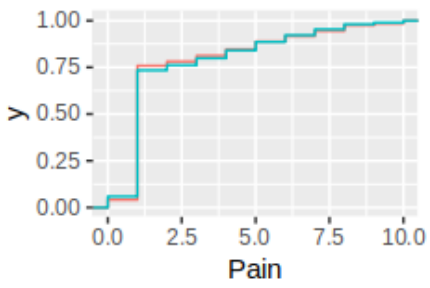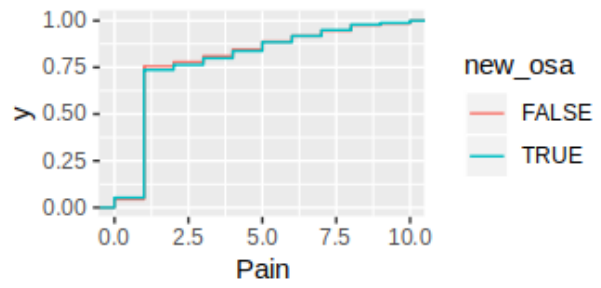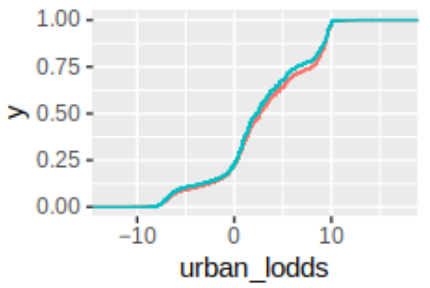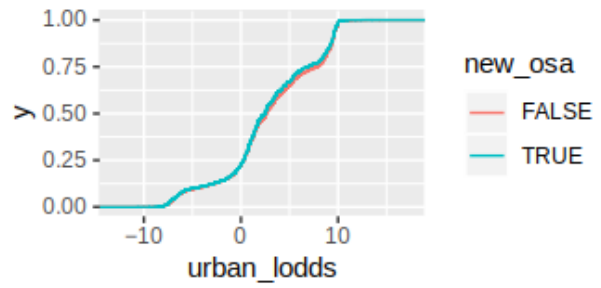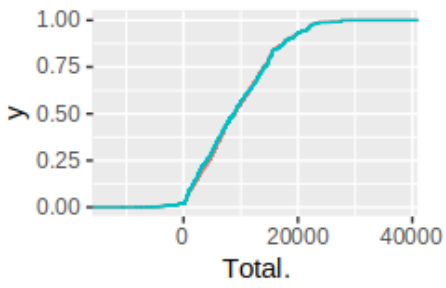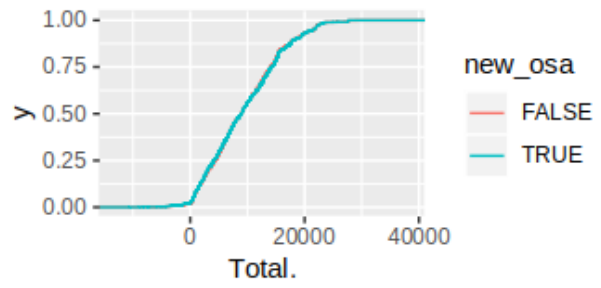



## eReferences

1. Buuren S van, Groothuis-Oudshoorn K. mice: Multivariate Imputation by Chained Equations in R. *Journal of Statistical Software*. 2011;45(1):1-67. doi:10.18637/jss.v045.i03
2. von Hippel PT. Regression with Missing Ys: An Improved Strategy for Analyzing Multiply Imputed Data. *Sociological Methodology*. 2007;37:83-117. doi:10.1111/j.1467-9531.2007.00180.x
3. Sullivan TR, Salter AB, Ryan P, Lee KJ. Bias and Precision of the “Multiple Imputation, Then Deletion” Method for Dealing With Missing Outcome Data. *Am J Epidemiol*. 2015;182(6):528-534. doi:10.1093/aje/kwv100
4. Leyrat C, Seaman SR, White IR, et al. Propensity score analysis with partially observed covariates: How should multiple imputation be used? *Stat Methods Med Res*. 2019;28(1):3-19. doi:10.1177/0962280217713032
5. Zhou X, Reiter JP. A Note on Bayesian Inference After Multiple Imputation. *The American Statistician*. January 2012. doi:10.1198/tast.2010.09109
6. Si Y, Reiter JP. A Comparison of Posterior Simulation and Inference by Combining Rules for Multiple Imputation. *J Stat Theory Pract*. 2011;5(2):335-347. doi:10/ggbsmq
7. He J, Yalov S, Hahn PR. XBART: Accelerated Bayesian Additive Regression Trees. In: *The 22nd International Conference on Artificial Intelligence and Statistics*. ; 2019:1130-1138.
8. Hahn PR, Carvalho CM, Puelz D, He J. Regularization and Confounding in Linear Regression for Treatment Effect Estimation. *Bayesian Anal*. 2018;13(1):163-182. doi:10.1214/16-BA1044
9. Saarela O, Belzile LR, Stephens DA. A Bayesian view of doubly robust causal inference. *Biometrika*. 2016;103(3):667-681. doi:10.1093/biomet/asw025
10. Hill JL. Bayesian Nonparametric Modeling for Causal Inference. *Journal of Computational and Graphical Statistics*. 2011;20(1):217-240. doi:10.1198/jcgs.2010.08162
11. Hahn PR, Murray JS, Carvalho C. Bayesian regression tree models for causal inference: regularization, confounding, and heterogeneous effects. *arXiv:170609523 [stat]*. June 2017. <http://arxiv.org/abs/1706.09523>. Accessed March 3, 2018.
12. Dorie V, Hill J, Shalit U, Scott M, Cervone D. Automated versus Do-It-Yourself Methods for Causal Inference: Lessons Learned from a Data Analysis Competition. *Statist Sci*. 2019;34(1):43-68. doi:10.1214/18-STS667
13. Hansen BB, Klopfer SO. Optimal full matching and related designs via network flows. *Journal of computational and Graphical Statistics*. 2006;15(3):609-627. doi:10.1198/106186006X137047
14. Lundberg S, Lee S-I. A Unified Approach to Interpreting Model Predictions. *arXiv:170507874 [cs, stat]*. May 2017. <http://arxiv.org/abs/1705.07874>. Accessed November 20, 2018.
